# Supplementary material for: Leveraging DNA-Methylation Quantitative-Trait Loci to Characterize the Relationship between Methylomic Variation, Gene Expression, and Complex Traits
Source: PubMed Central journal article supplement (PMC6217758; doi:10.1016/j.ajhg.2018.09.007), 2018-10-25
Supplement: mmc1.pdf [file mmc1.pdf]

**The American Journal of Human Genetics, Volume 103**

**Supplemental Data**

**Leveraging DNA-Methylation Quantitative-Trait Loci  
to Characterize the Relationship between Methylomic  
Variation, Gene Expression, and Complex Traits**

**Eilis Hannon, Tyler J. Gorrie-Stone, Melissa C. Smart, Joe Burrage, Amanda Hughes, Yanchun Bao, Meena Kumari, Leonard C. Schalkwyk, and Jonathan Mill**

Figure S1: Overview of the study providing a schematic of our analytical plan and the datasets used in analyses.

## Overview of analytical plan and datasets.

### Identification of DNA methylation quantitative trait loci (mQTL)

Data:

Understanding Society UK Household Longitudinal study (UKHLS) (n = 1,111)

(<https://www.understandingsociety.ac.uk/>)

Illumina EPIC array (766,714 DNA methylation sites)

Imputed genotypes (5,210,475 genetic variants)

Analytical software:

Matrix EQTL ([http://www.bios.unc.edu/research/genomic\\_software/Matrix\\_eQTL/](http://www.bios.unc.edu/research/genomic_software/Matrix_eQTL/))

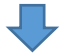

### Aim 1: Refinement of genetic association signals from GWAS analyses

Data:

Publically available GWAS results

(see **Supplementary Table 5**)

Westra et al (n = 5,111)

(<https://molgenis58.target.rug.nl/bloodeqtlbrowser/>)

blood *cis* eQTL results

Analytical software:

SMR (<http://cnsgenomics.com/software/smr/>)

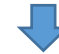

### Aim 2: Identification of associations between DNAm and gene expression:

Data:

Westra et al (n = 5,111)

(<https://molgenis58.target.rug.nl/bloodeqtlbrowser/>)

blood *cis* eQTL results

Analytical software:

SMR (<http://cnsgenomics.com/software/smr/>)



**Figure S2: Genic distribution of novel associations between genetic variation and DNA methylation using the Illumina EPIC array.** Barplot demonstrating the genic feature annotation of DNA methylation sites associated with common genetic variation split by whether the DNA methylation site was part of the older 450K array (red) or novel to the EPIC array (blue).

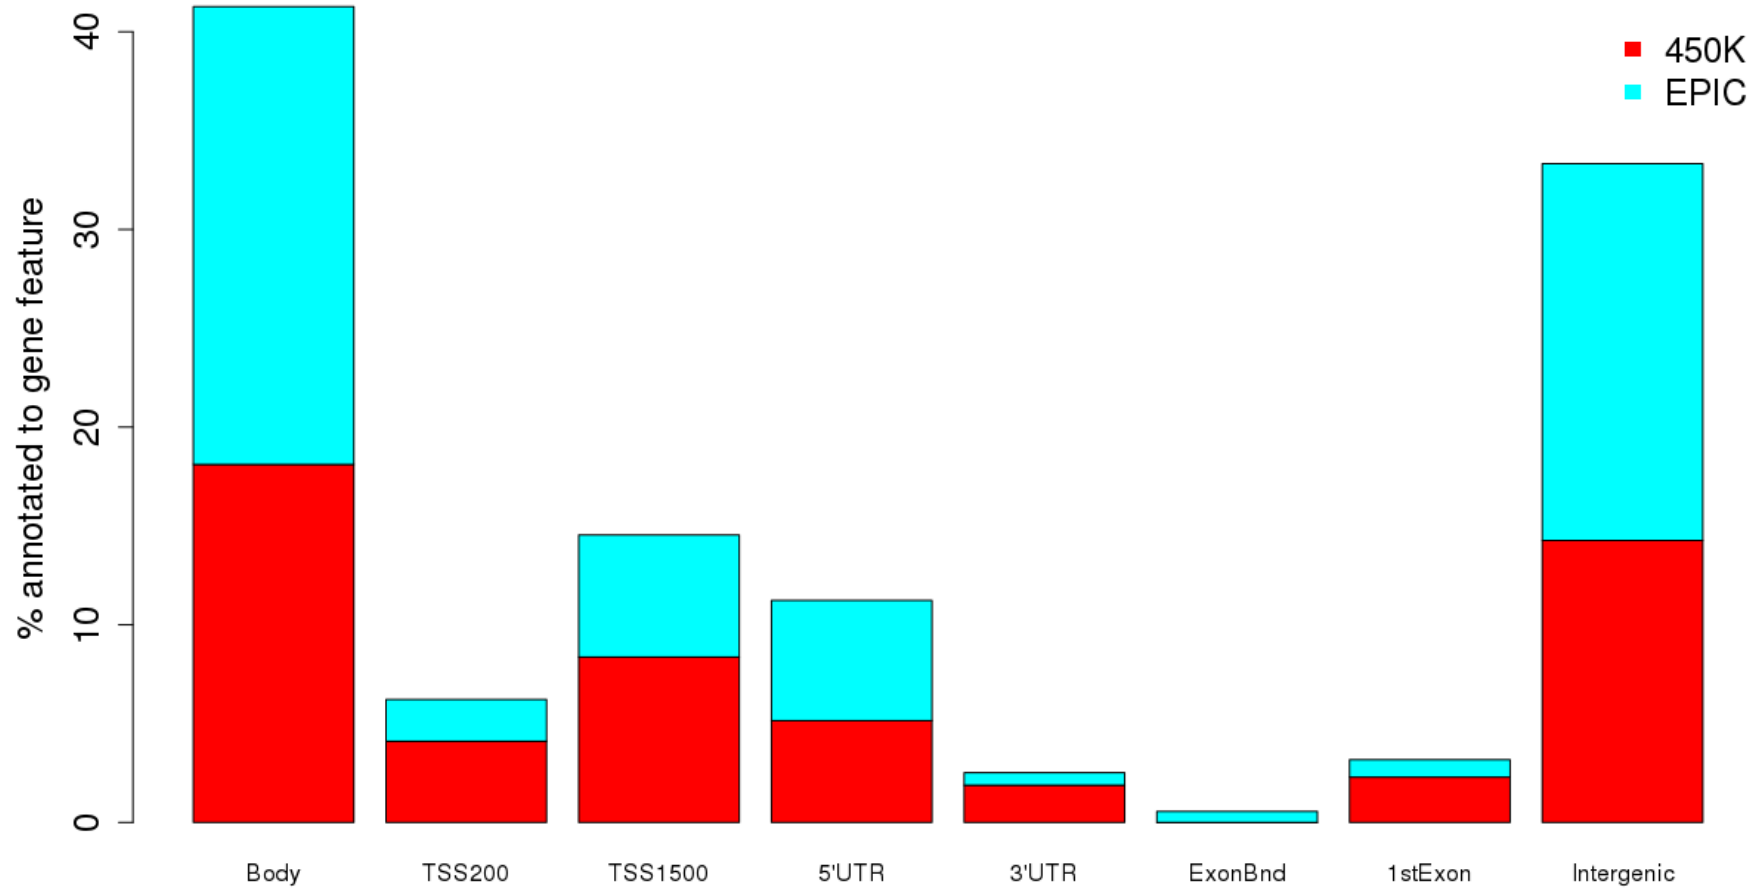

**Figure S3: Additional content on the Illumina EPIC array enable the identification of novel DNA methylation quantitative trait loci (mQTL) associations.** Venn diagram of the overlap of genes annotated to genetically influenced DNA methylation sites (identified at  $P < 6.52 \times 10^{-14}$ ) through content included on the 450K array and novel content added to the EPIC array. The outside circle includes all genes annotated to any DNA methylation site tested.

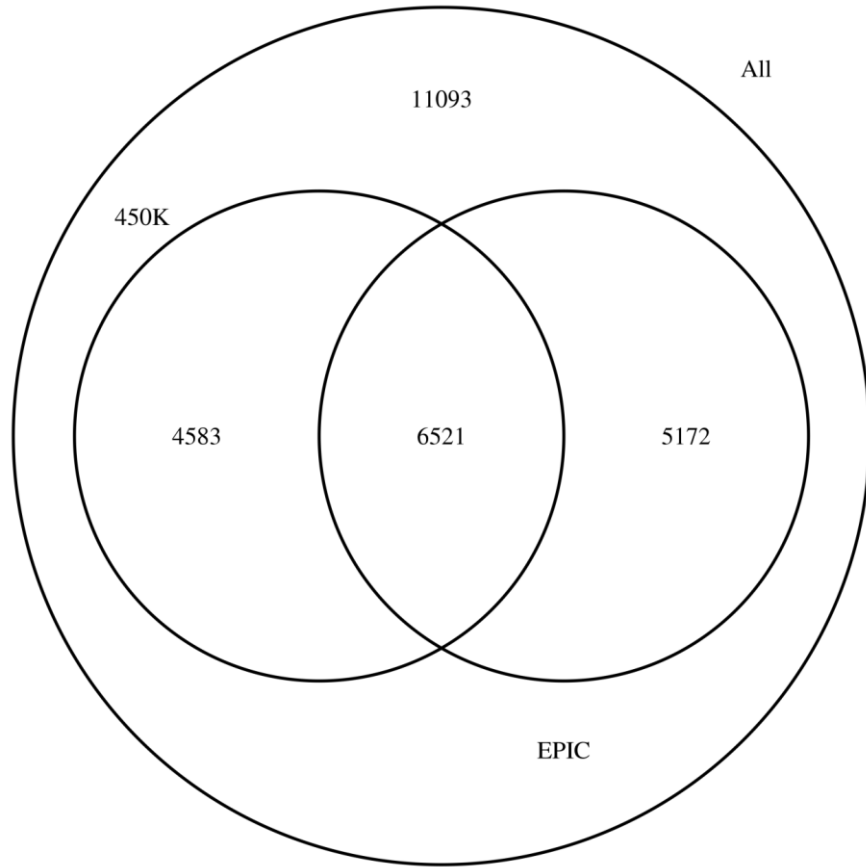

**Figure S4: Frequency distribution of DNA methylation quantitative trait loci (mQTL) SNPs and their associated DNA methylation sites.** Histograms of **A)** the number of independent genetic variants an individual DNA methylation site is associated with and **B)** the number of DNA methylation sites a genetic variant is associated with. Genetically-mediated DNA methylation sites are often associated with multiple mQTL SNPs (likely reflecting an artefact of linkage disequilibrium), but mQTL SNPs are associated with DNA methylation at relatively few sites.

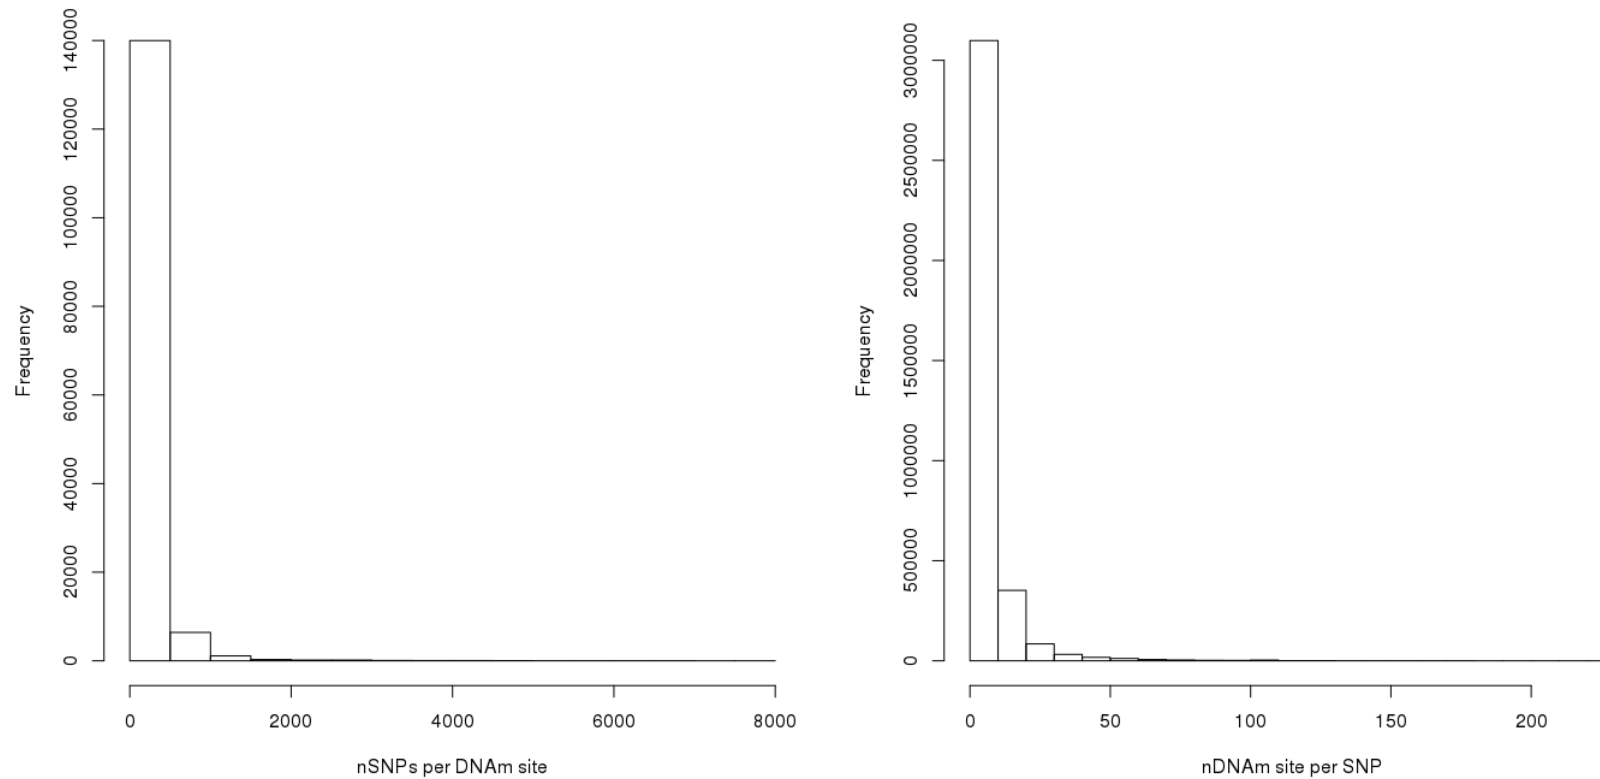

**Figure S5: Frequency distribution of DNA methylation quantitative trait loci (mQTL) SNPs and associated DNA methylation sites after filtering for independent associations.** Histograms of **A**) the number of independent genetic variants a DNA methylation site is associated with and **B**) the number of DNA methylation sites a genetic variant is associated with. Independent genetic signals were identified by clumping DNA methylation quantitative trait loci with a Bonferroni corrected P value of  $P < 6.52 \times 10^{-14}$ . After controlling for correlated genetic signals, each DNA methylation site is associated with a median of 1 genetic variant, and each genetic variant is associated with a median of 1 DNA methylation site.

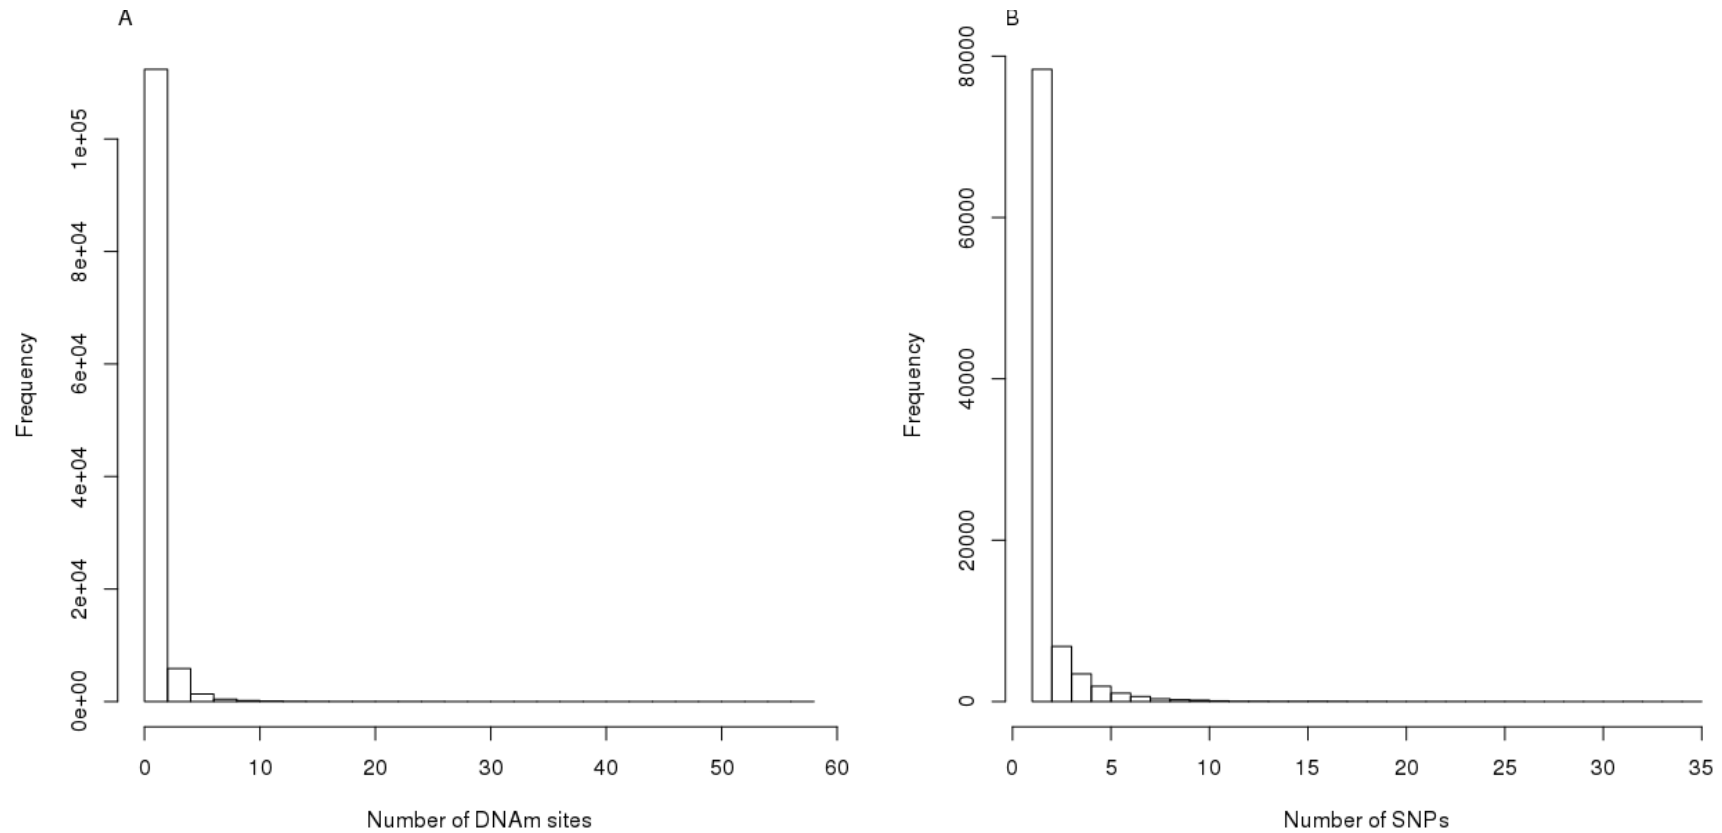

**Figure S6: The distribution of effect sizes across all Bonferroni significant DNA methylation quantitative trait loci (mQTL).** Shown is the DNA methylation difference (% DNA methylation) associated with each minor allele for all mQTLs ( $P < 6.52 \times 10^{-14}$ ), *cis*-acting mQTLs, and *trans*-acting mQTLs. The average effect size for *trans*-mQTLs (3.26% (SD = 2.78%) per allele) is significantly lower than that observed for *cis*-mQTLs (3.48% (SD = 3.03%) per allele) (two-sided Wilcoxon rank sum test,  $P = 1.69 \times 10^{-19}$ ).

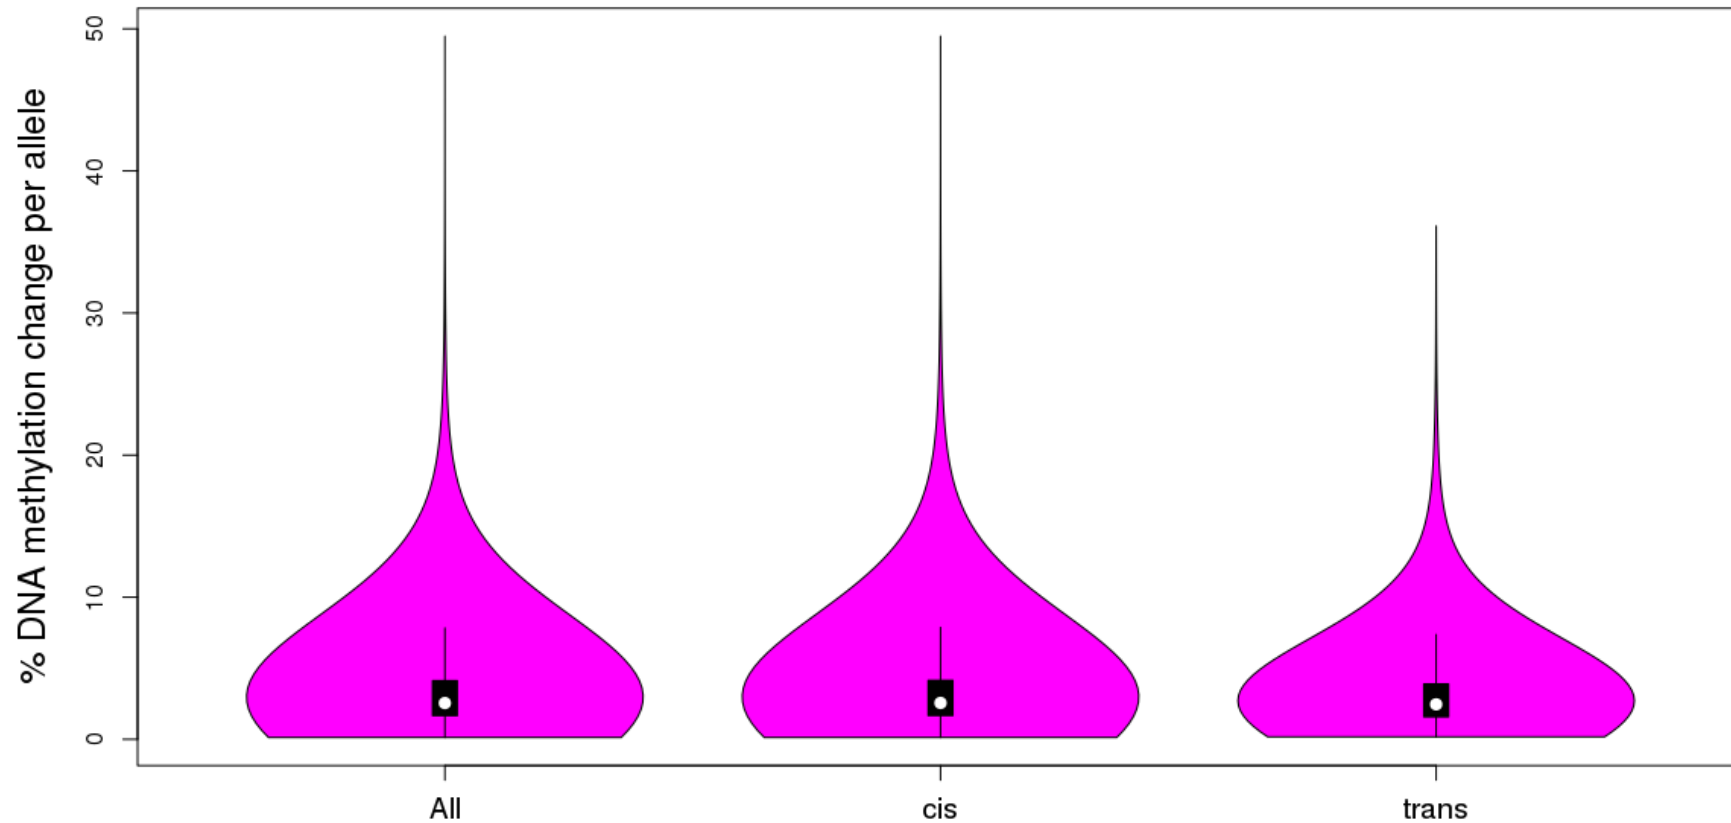

**Figure S7: The significance and effect size of cis mQTL associations increases as the distance between the genetic variant and DNAm site decreases.** Shown is the relationship between A) mQTL significance ( $-\log_{10}$  P value) and B) the mean change in DNA methylation (%) per allele and distance between the DNA methylation site and genetic variant. The color of the points reflects the density of observations at that location, with gray indicating smallest density and red the highest.

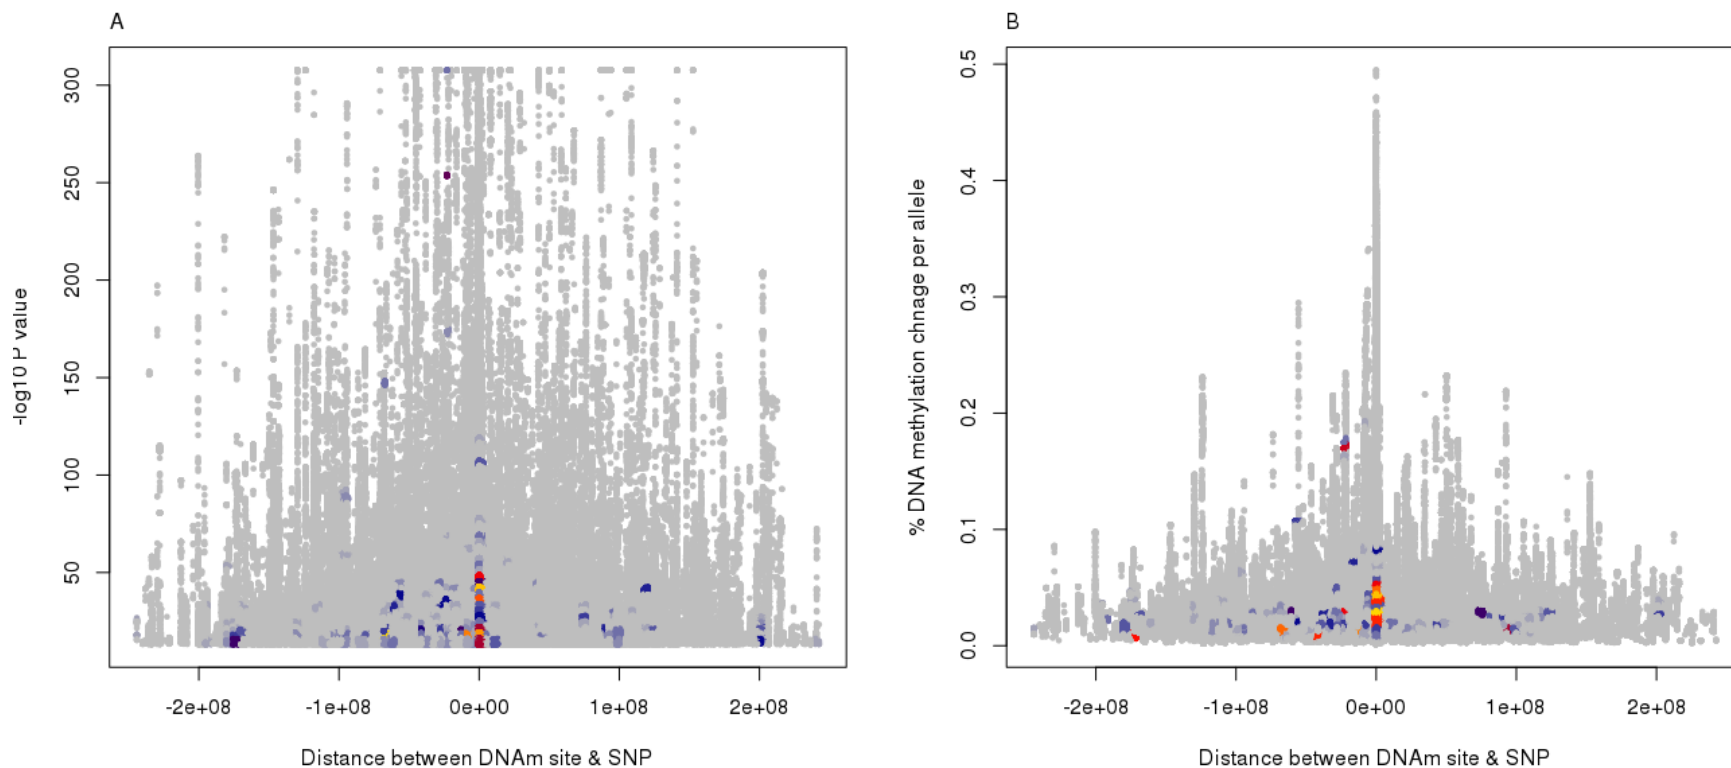

**Figure S8: Genic distribution of DNA methylation sites associated with mQTL variation.** Bar-plot demonstrating the genic location of DNA methylation sites associated with common genetic variation ( $P < 6.52 \times 10^{-14}$ ; blue bars) compared to the background distribution of all DNA methylation sites tested in the mQTL analysis (gray bars). DNA methylation sites associated with mQTLs are significantly enriched in intergenic regions, and significantly depleted in both the gene body and 1<sup>st</sup> Exon.

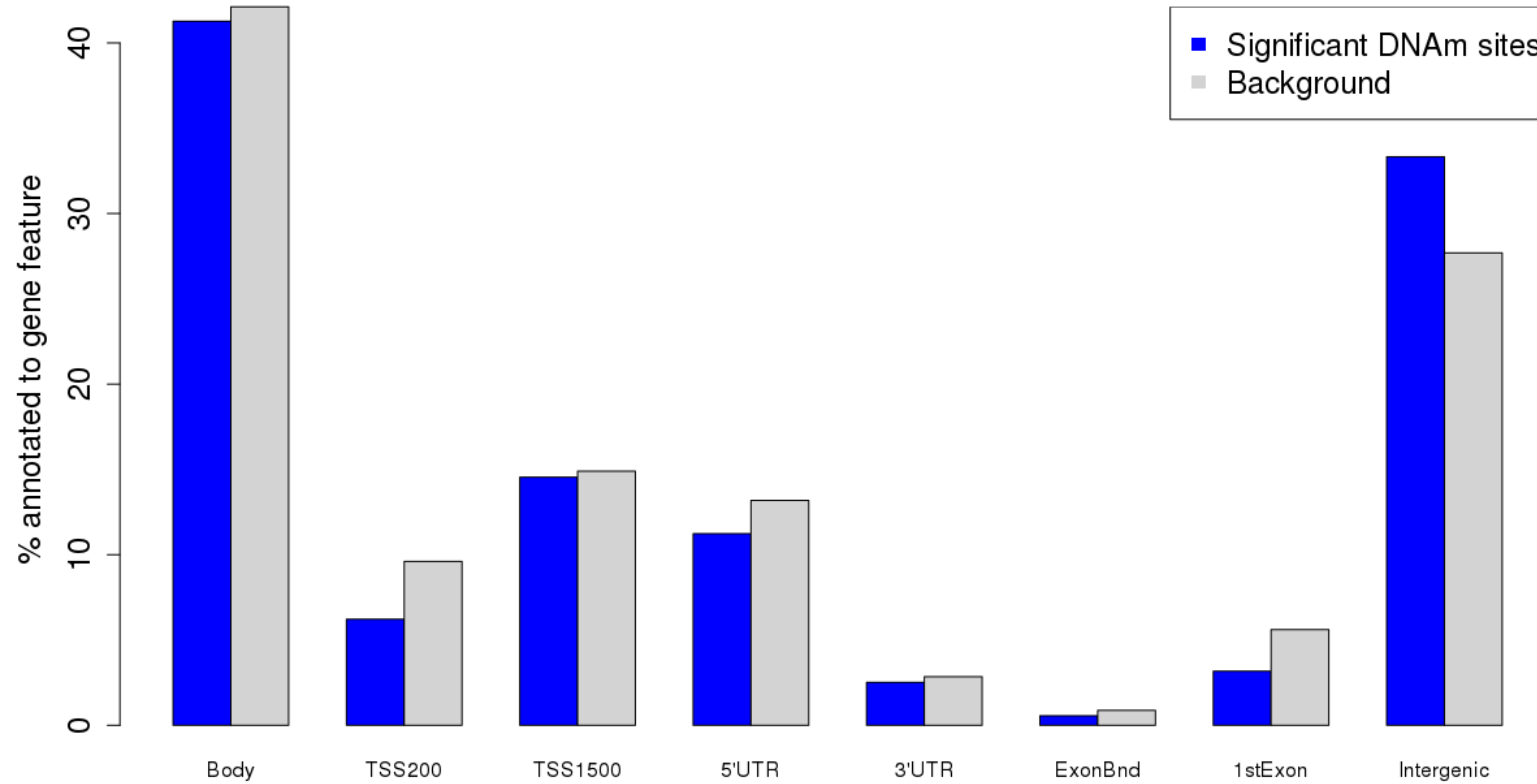

**Figure S9: Distribution of DNA methylation sites associated with mQTL variation in CpG island features.** Bar-plot demonstrating the genic location of DNA methylation sites associated with common genetic variation ( $P < 6.52 \times 10^{-14}$ ; blue bars) compared to the background distribution of all DNA methylation sites tested in the mQTL analysis (gray bars). DNA methylation sites associated with mQTLs are significantly enriched in CpG shores and regions classified as “open sea”, and significantly depleted in CpG islands

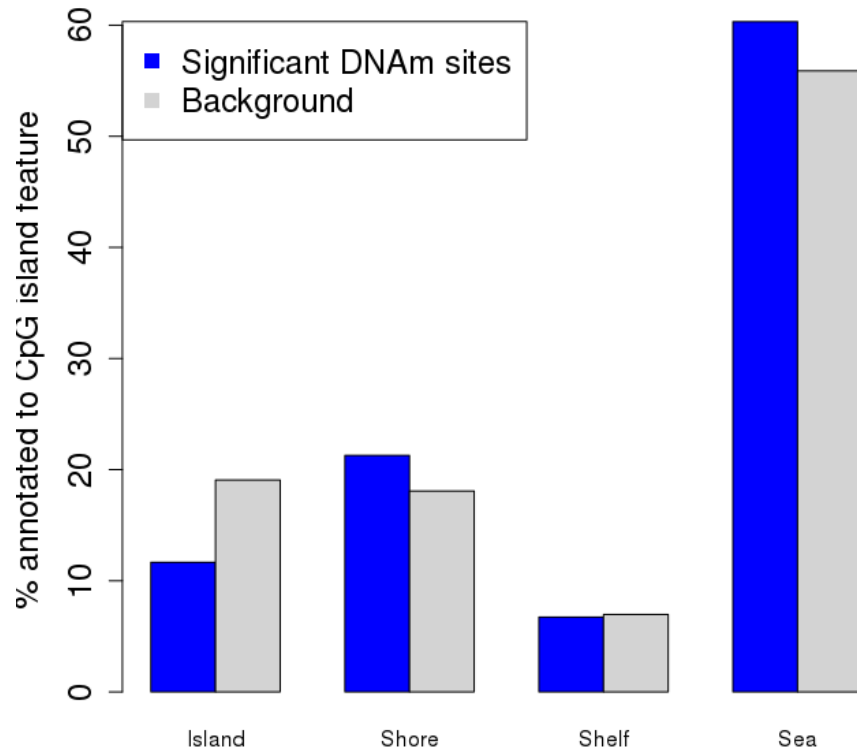



**Figure S10: DNA methylation sites associated with common mQTL variants are more strongly influenced by additive genetic variation.** Density plots of the distribution of percentage of variance in DNA methylation explained by genetic factors ( $h^2$ ) as reported by (van Dongen et al. 2016). The distribution of all DNA methylation sites tested (black line), all DNA methylation sites with a Bonferroni significant association ( $P < 6.52 \times 10^{-14}$ ; red line), DNA methylation sites identified with a *cis* acting genetic association (blue line) and DNA methylation sites identified with a *trans* acting genetic association (green line). *cis* effects are defined as those where the DNA methylation site and genetic variants are located within 500kilbases on the same chromosome.

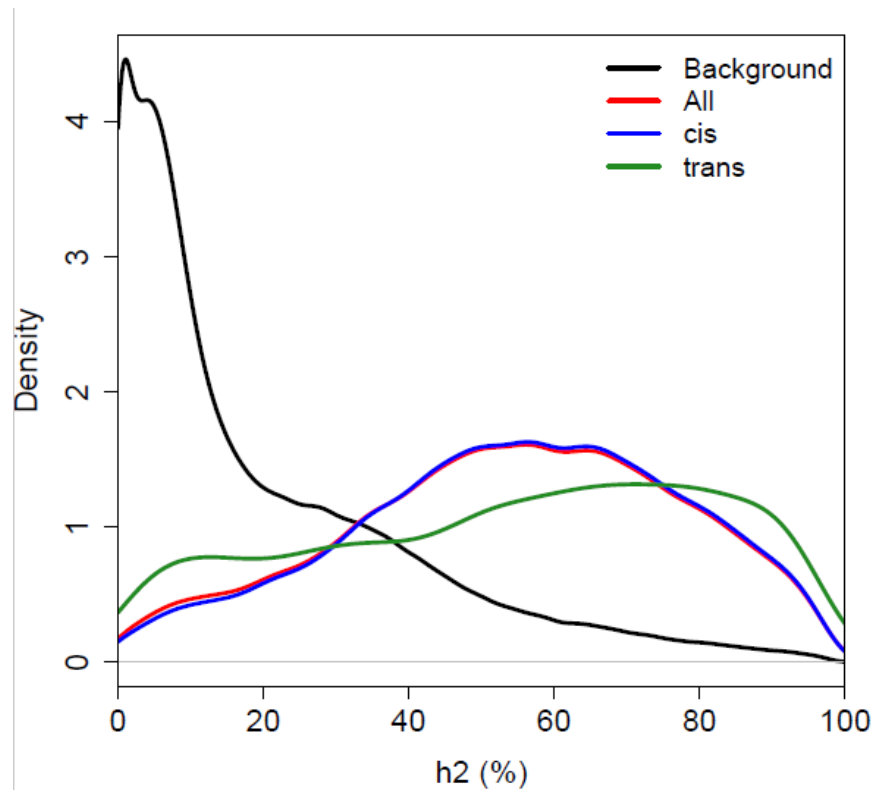

**Figure S11: Distribution of correlation coefficients between pairs of DNAm sites with shared genetic effects.** Histogram of correlation coefficients between pairs of DNAm sites with convincing evidence for co-localisation of genetic associations ( $n = 234,460$  pairs with  $PP_3 + PP_4 > 0.99$  &  $PP_4/PP_3 > 5$ ). These pairs are enriched for concordant directions of effects (71.2% pairs with positive correlations vs 28.8% pairs with negative correlations, binomial test  $P = 1.48 \times 10^{-323}$ ).

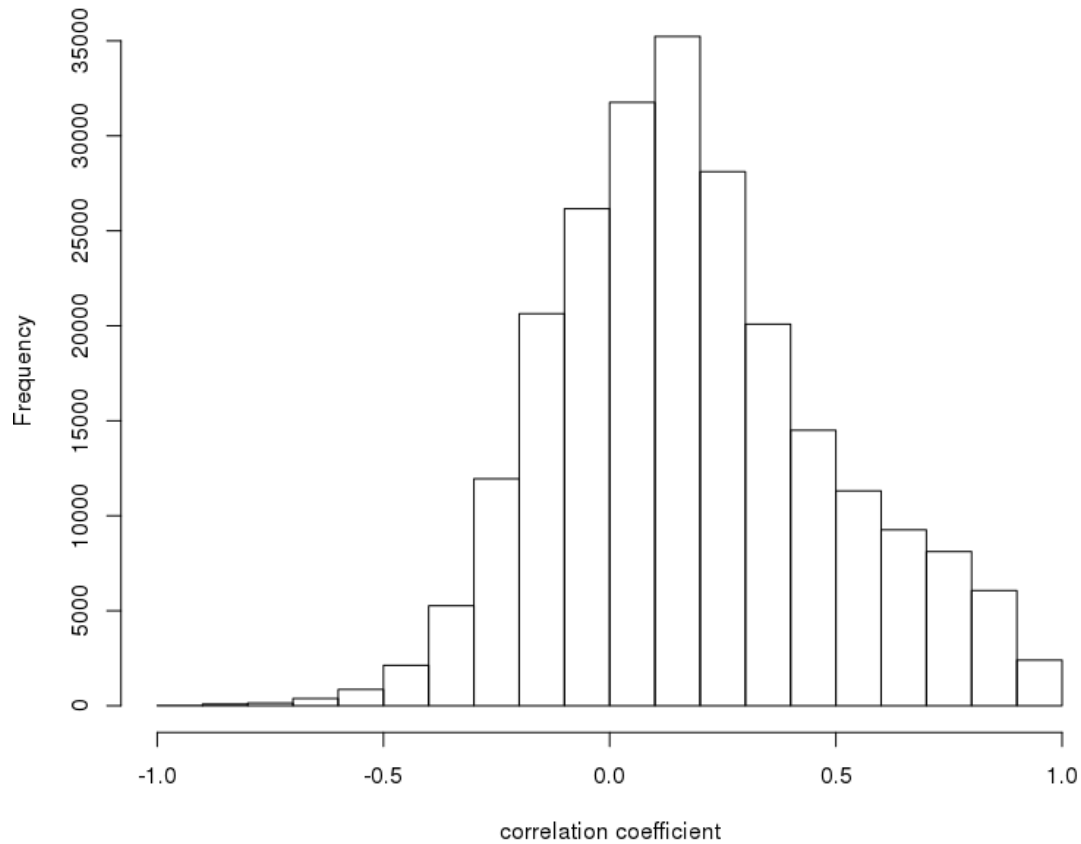

**Figure S12: Distribution of correlation coefficients between pairs of DNAm sites with shared genetic effects, split by genic feature annotation.**

Boxplots of correlation coefficients between pairs of DNAm sites split by the genic feature annotation of the two DNAm sites in the pair for A) all pairs with convincing evidence for co-localisation of genetic associations ( $n = 234,460$  pairs with  $PP_3 + PP_4 > 0.99$  &  $PP_4/PP_3 > 5$ ) and B) the subset of convincing pairs annotated to the same gene ( $n = 83,416$ ). The colour of the boxplot indicates the genic feature category of one DNAm site in the pair and the location of the box indicates the genic feature category of the second DNAm site. For example, the first boxplot on the far left of the figure presents the distribution of all pairs of DNAm sites where both sites are located in the 1<sup>st</sup> exon (indicated by the location in the 1<sup>st</sup> Exon panel and the colour red), the second yellow boxplot from the left presents the distribution of all pairs of DNAm sites where one DNAm site is located in the 1<sup>st</sup> Exon (indicated by the location in the 1<sup>st</sup> Exon panel) and the second is in the 3'UTR (indicated by the colour). In general we observe that where both DNAm sites are annotated the same genic feature the correlations are more likely to be positive (OR = 1.73, fisher's  $P < 2.2 \times 10^{-16}$ ) and higher (Mann-Whitney test  $P < 2.2 \times 10^{-16}$ ) compared to pairs annotated to different genic features.

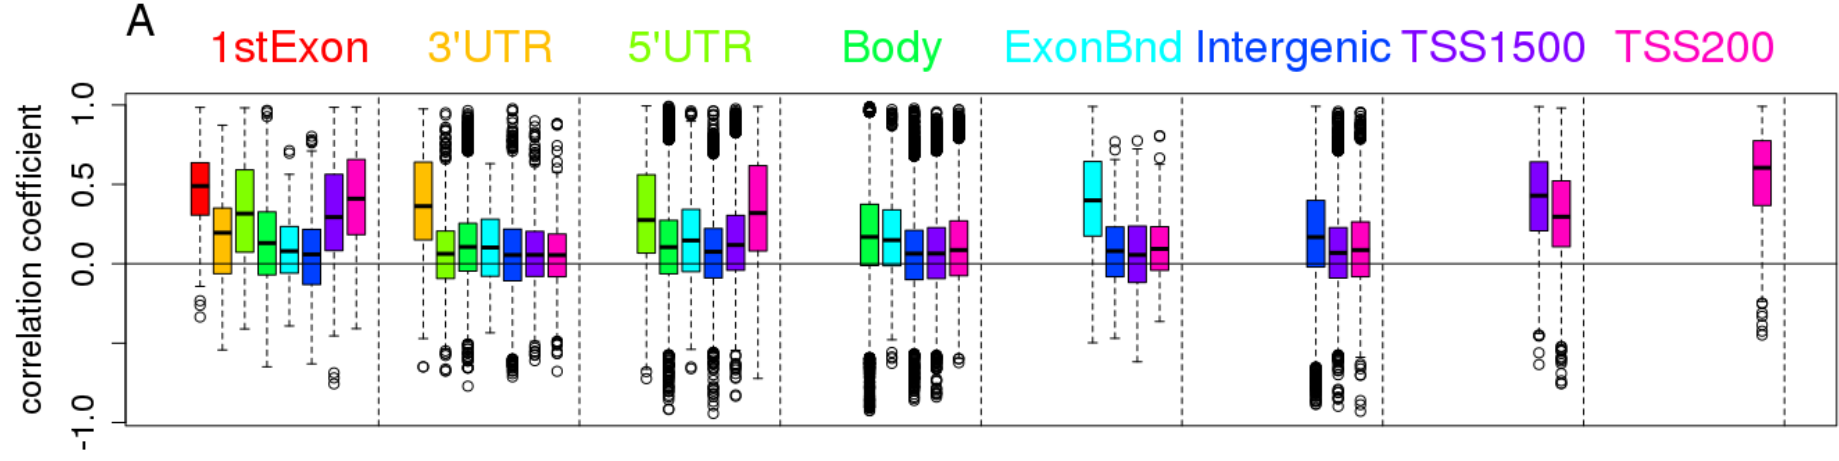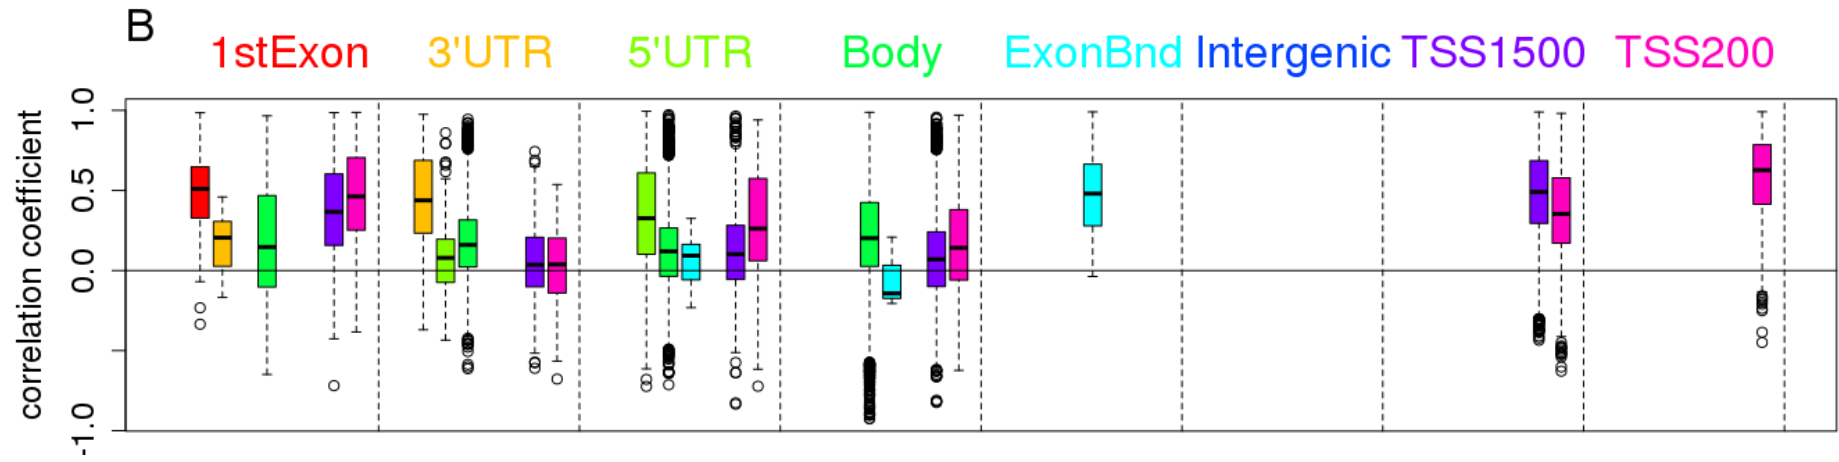

**Figure S13: Manhattan plots of Summary data-based Mendelian Randomisation (SMR) tests for pleiotropic effects between 63 complex traits and DNA methylation.** Shown on the y-axis of each plot is the  $-\log_{10}$  P-value from the SMR analysis using DNA methylation quantitative trait loci (mQTL) generated from whole blood. Each point represents an SMR test for a particular DNA methylation site. The red horizontal line represents the genome-wide multiple testing significance threshold ( $P < 6.42 \times 10^{-7}$ ); green points highlight the significant SMR tests which are not characterized by significant heterogeneity (i.e.  $P > 0.05$ ), indicating pleiotropic relationships between that trait and either DNA methylation.

### Acute insulin response

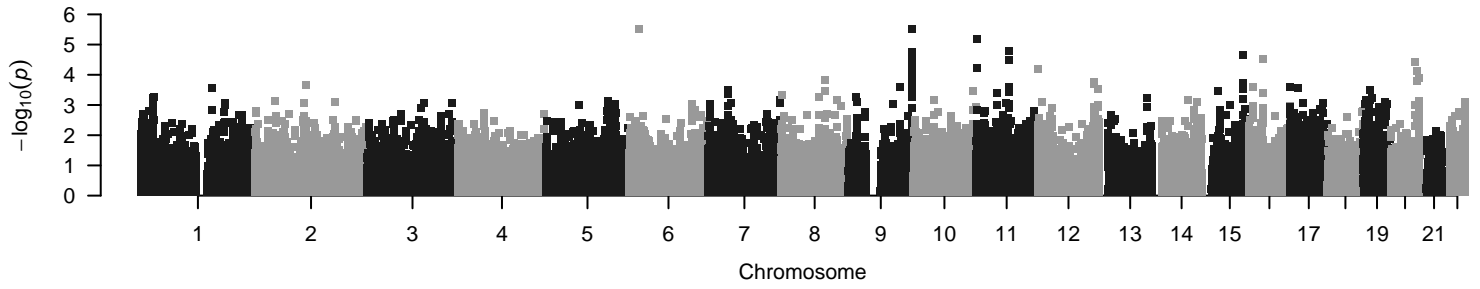

### Acute insulin response adj SI, BMI

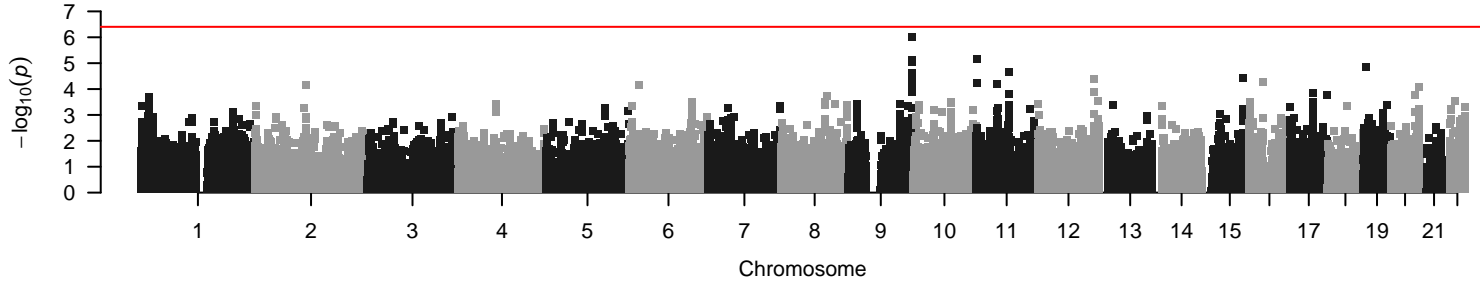

### BMI

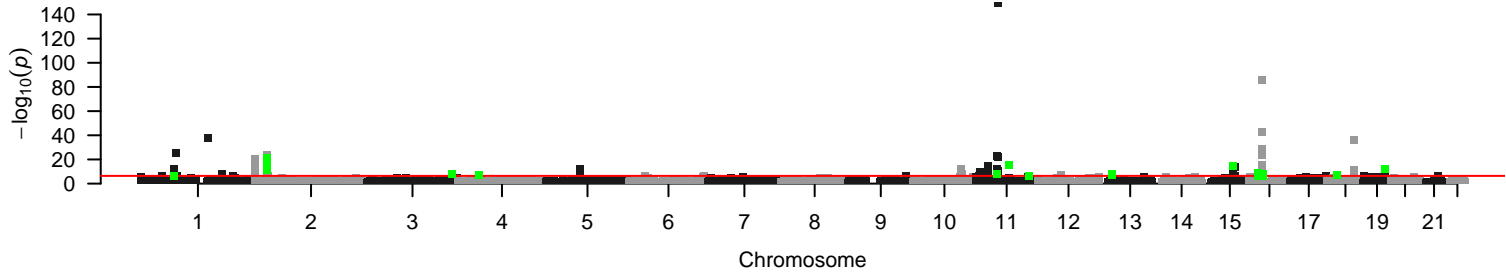

### Bipolar disorder

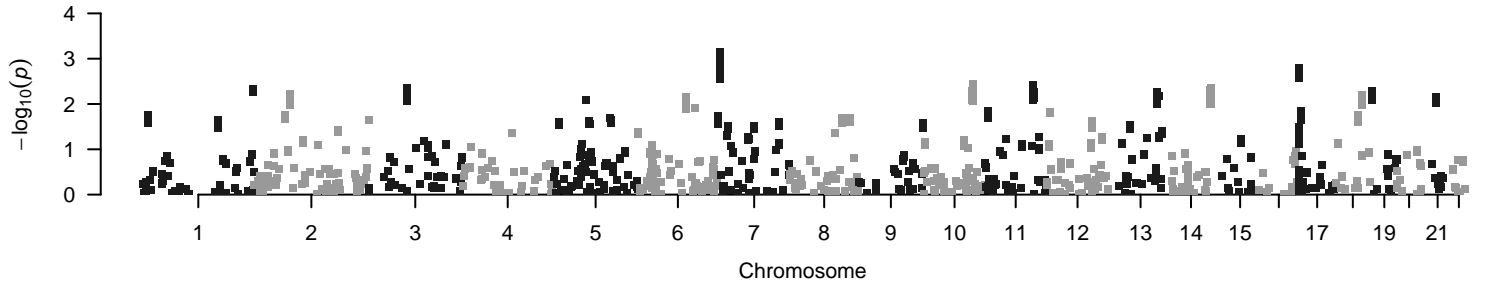

### Coronary artery disease

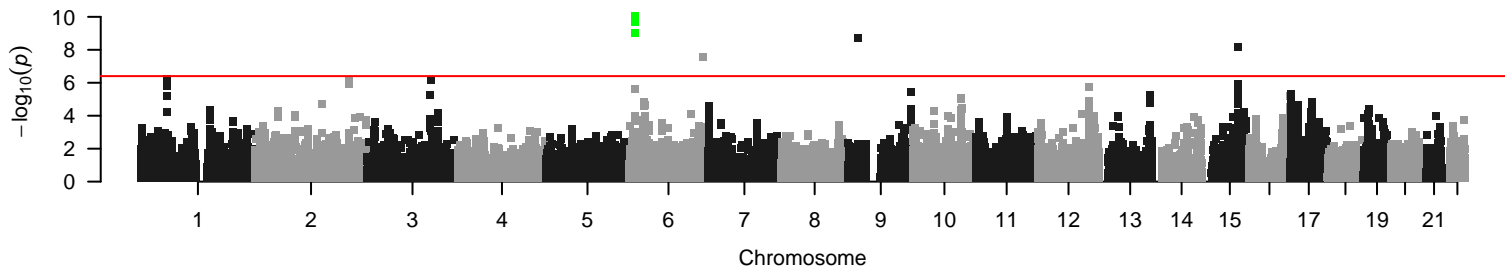

### Crohn's disease

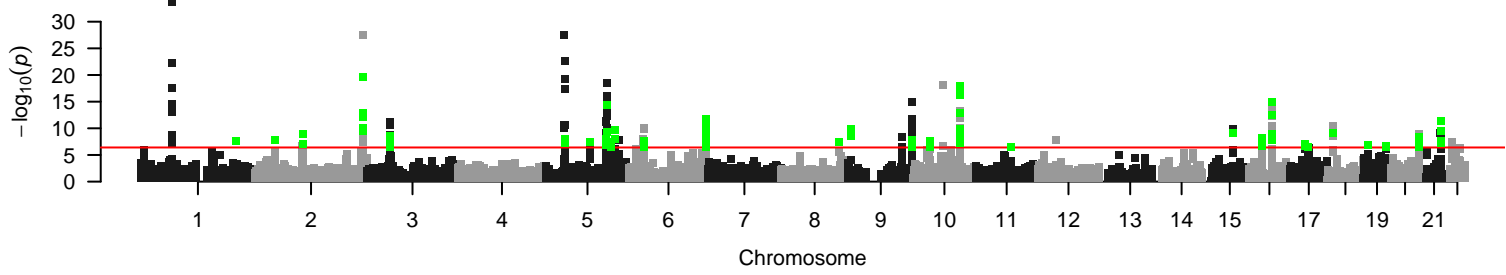

### Chronotype

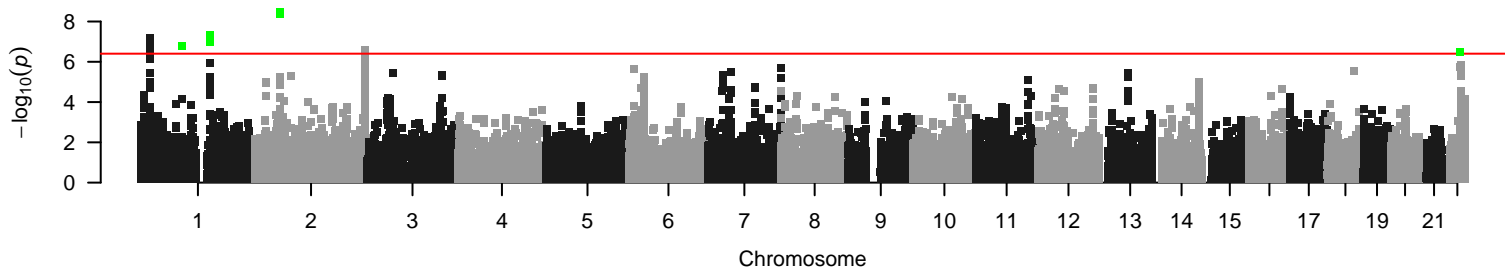

### Chronic Kidney Disease

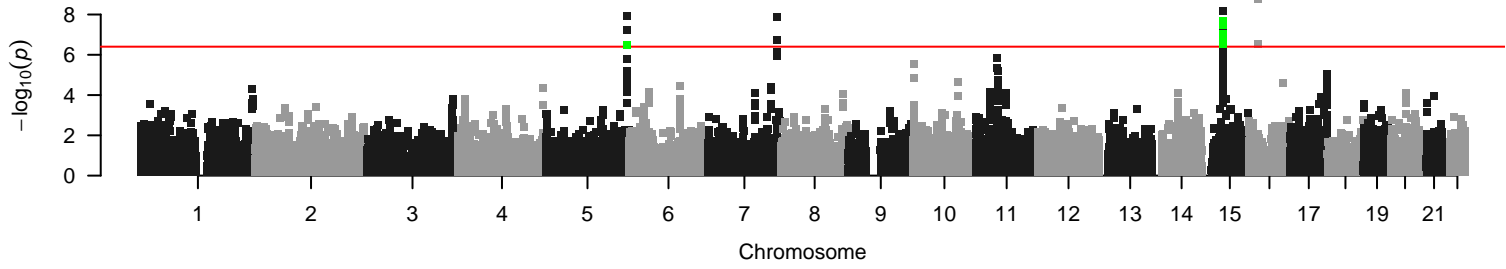

### Cigarettes per day

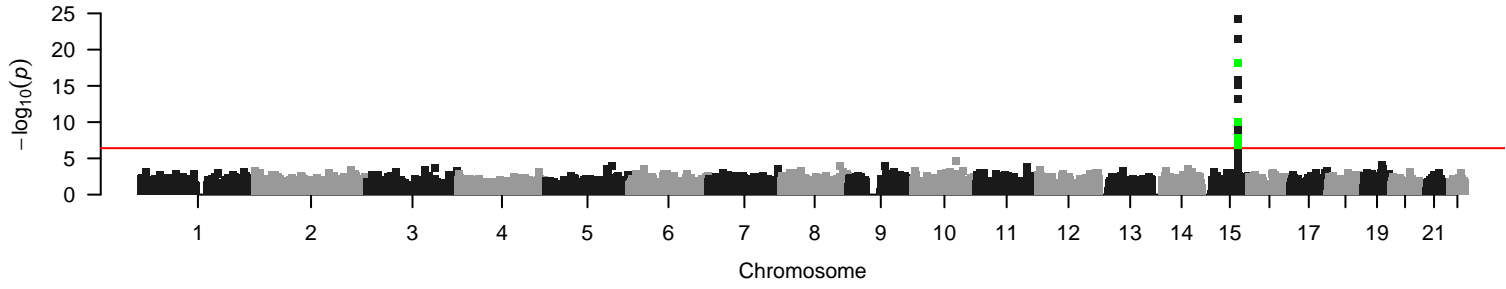

### Disposition index

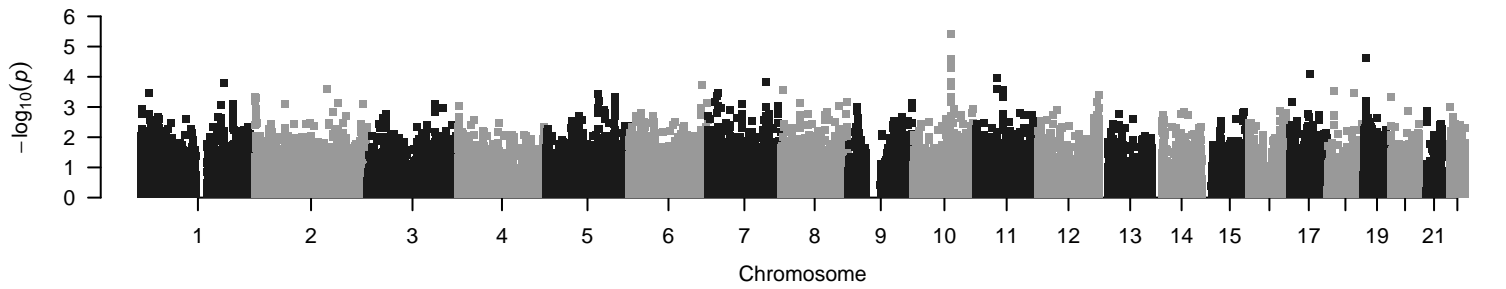

### Disposition index adjBMI

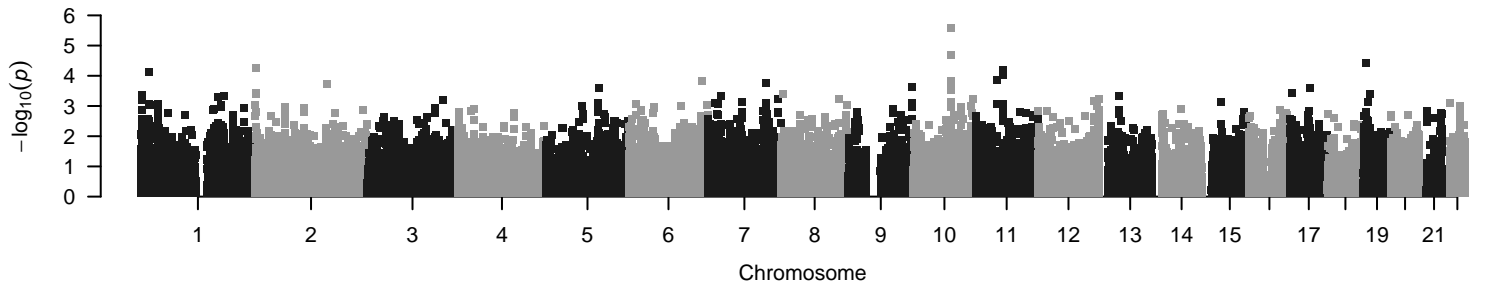

### eGFRcrea (estimated glomerular filtration rate based on serum creatinine)

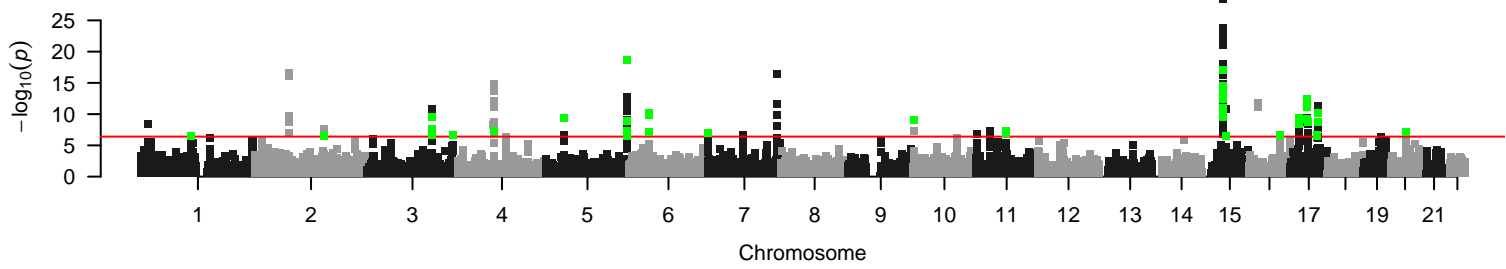



### eGFRcys (estimated glomerular filtration rate cystatin C)

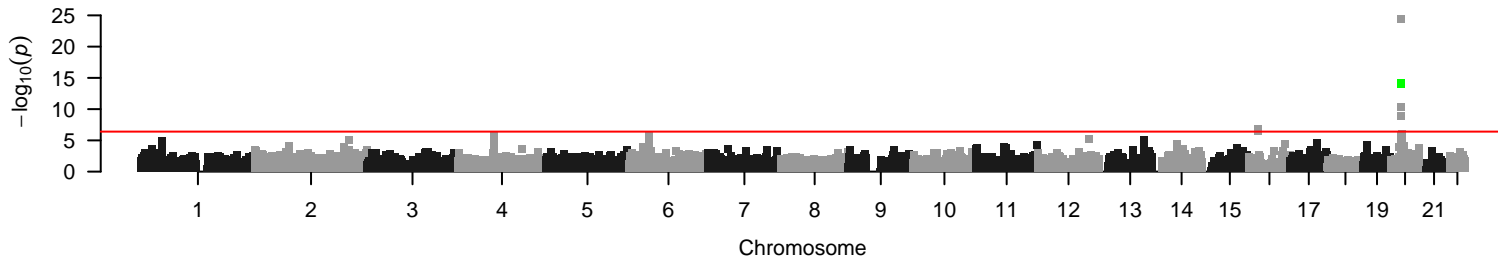

### Birth length

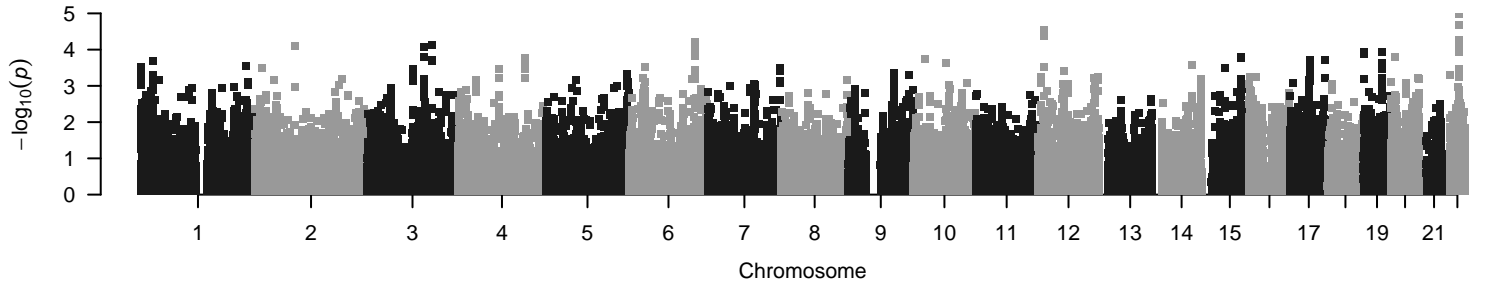

### Ever smoked

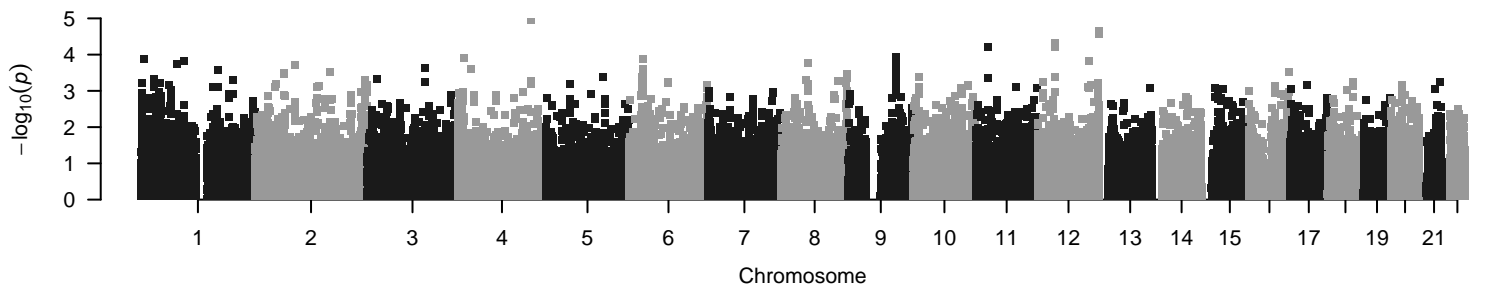

### Extreme BMI

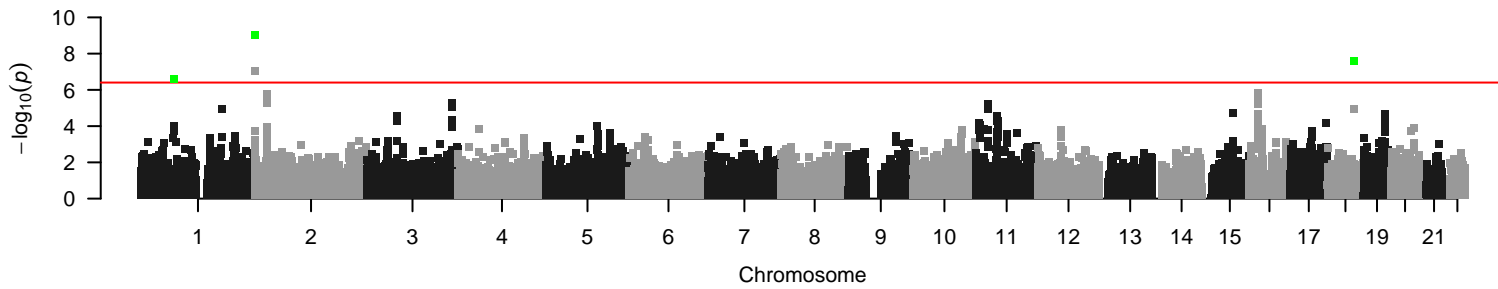

### Extreme height

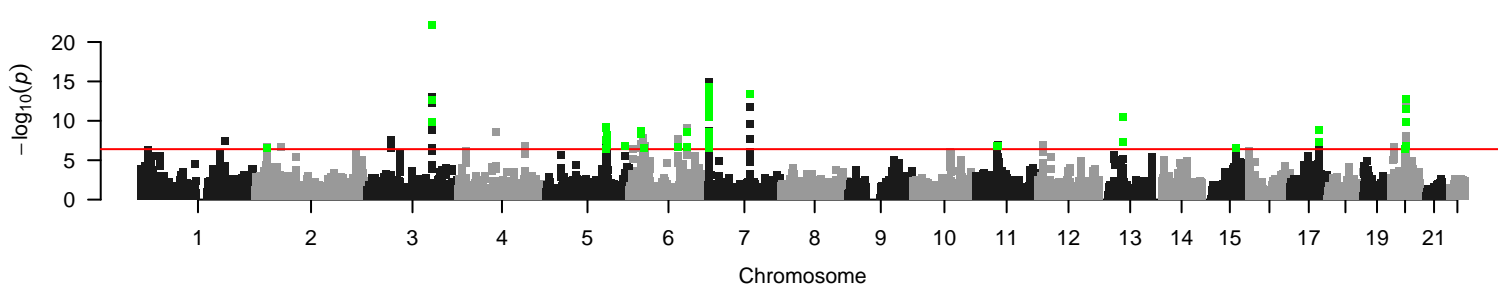

### Extreme waist hip ratio

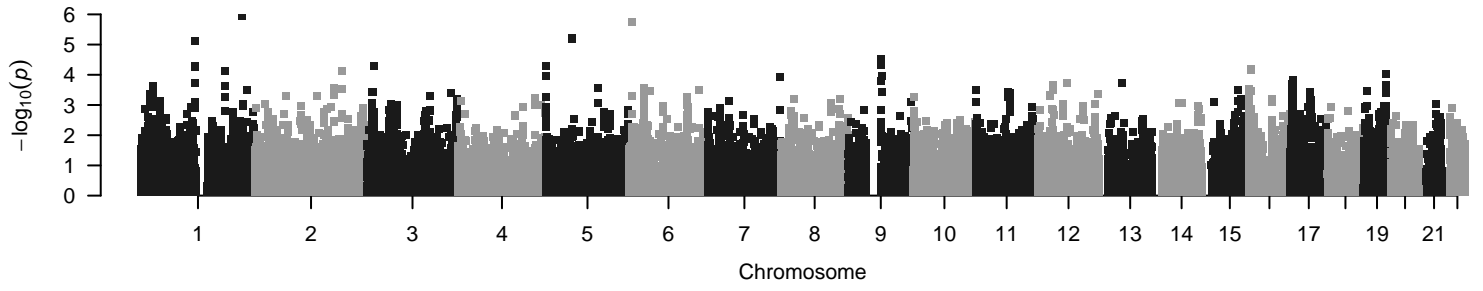

### Father age at death

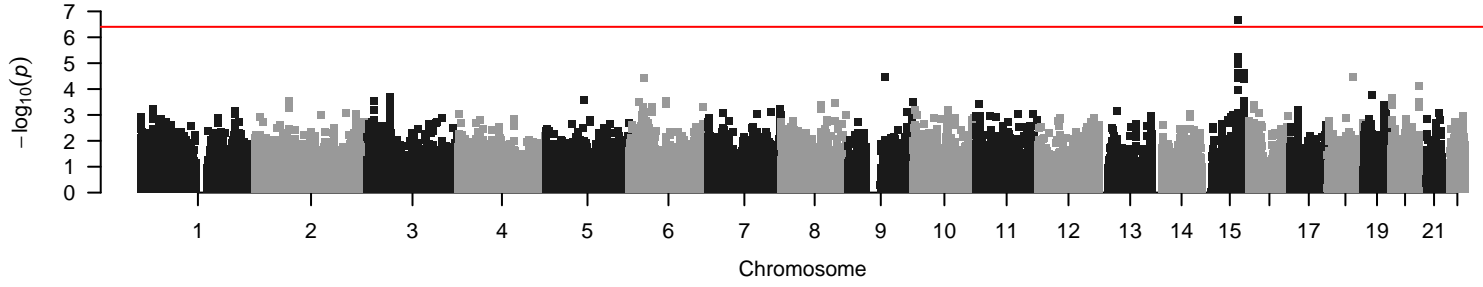

### HDL

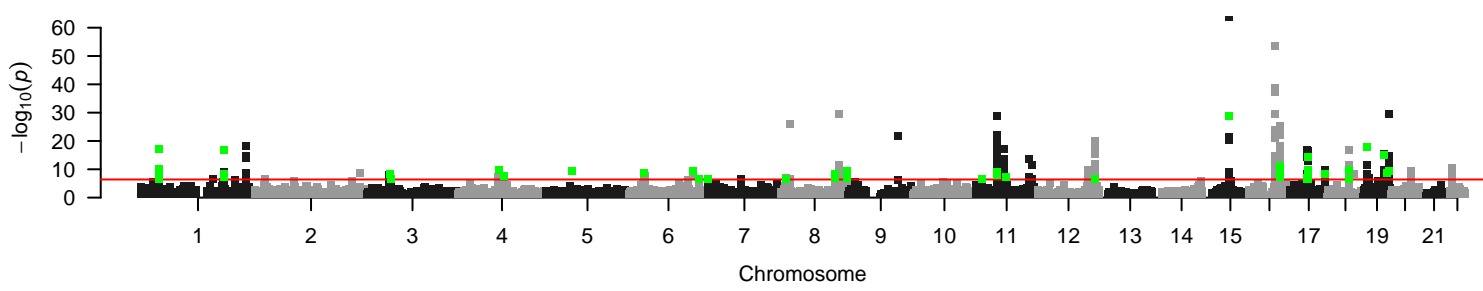

### Height

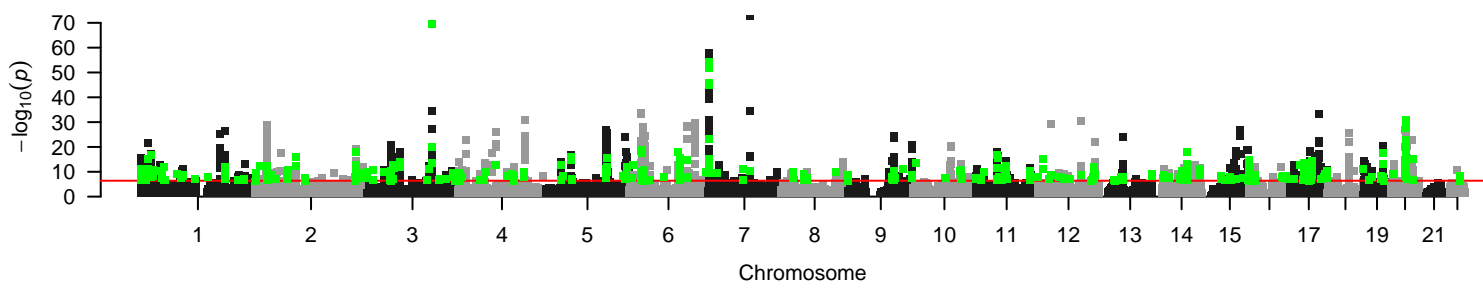

### Hip circumference

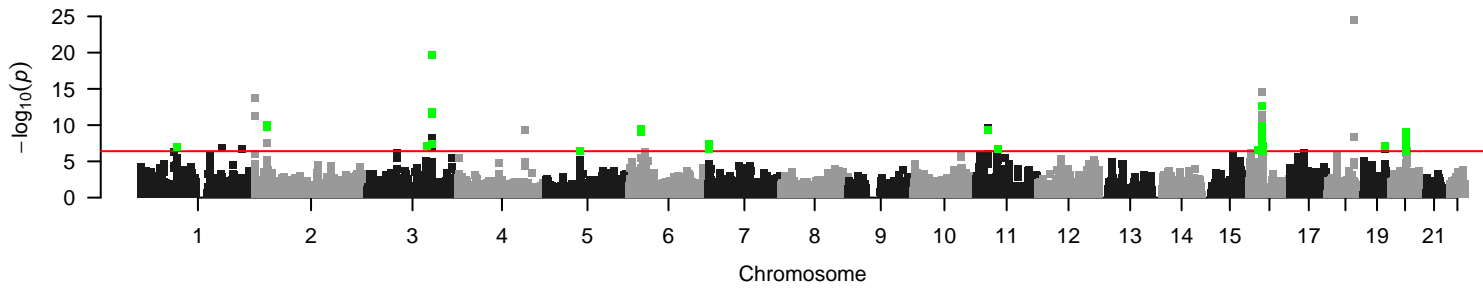

### Inflammatory bowel disease

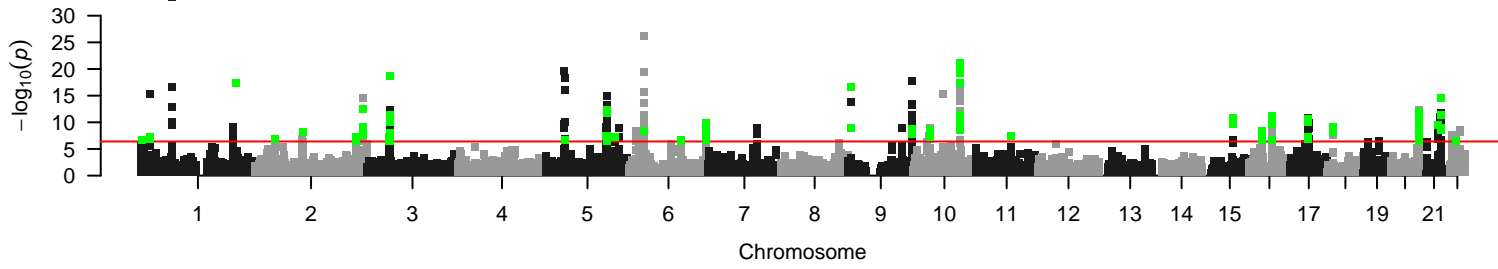

### Insulin secretion rate

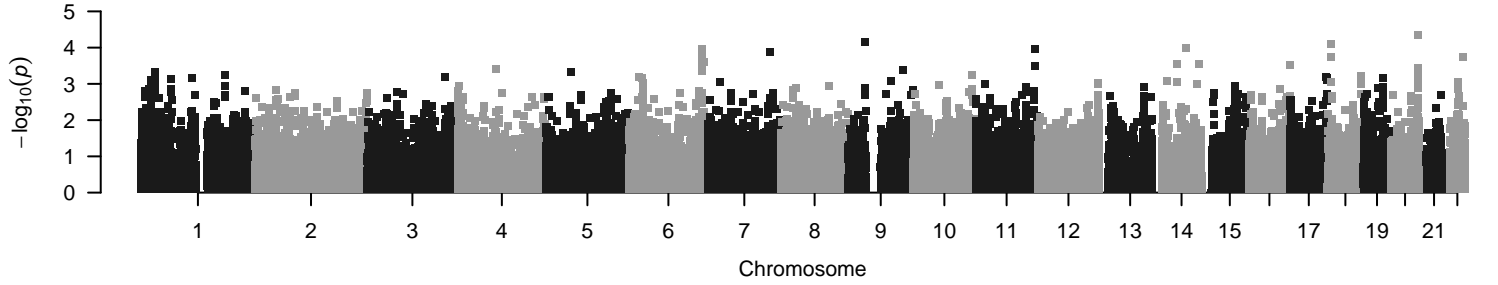

### Insulin secretion rate adjBMI

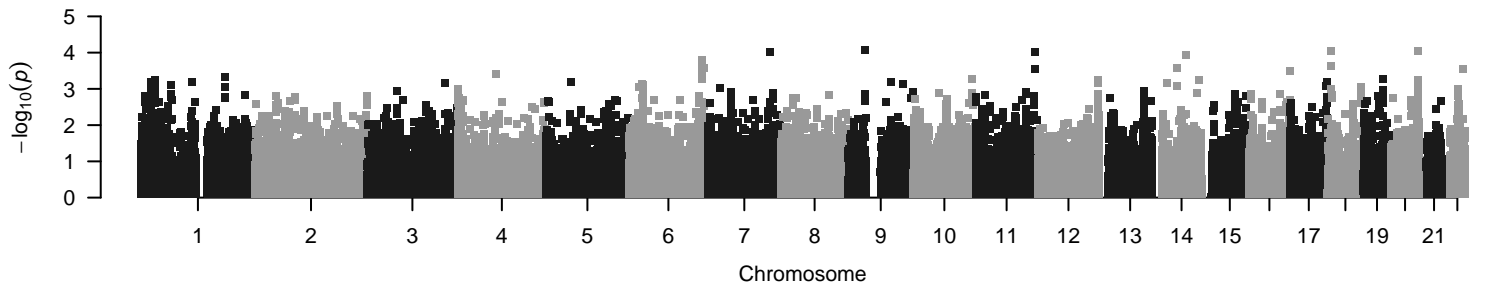

### LDL

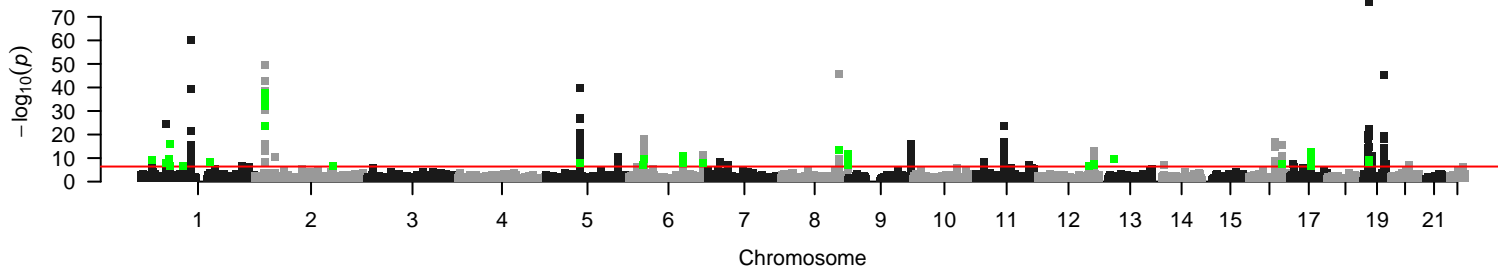

### Major depressive disorder

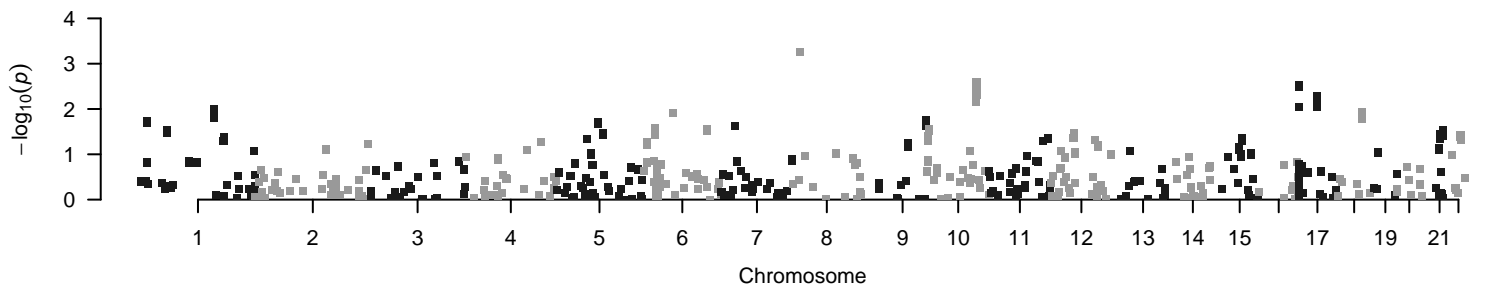



### Overweight

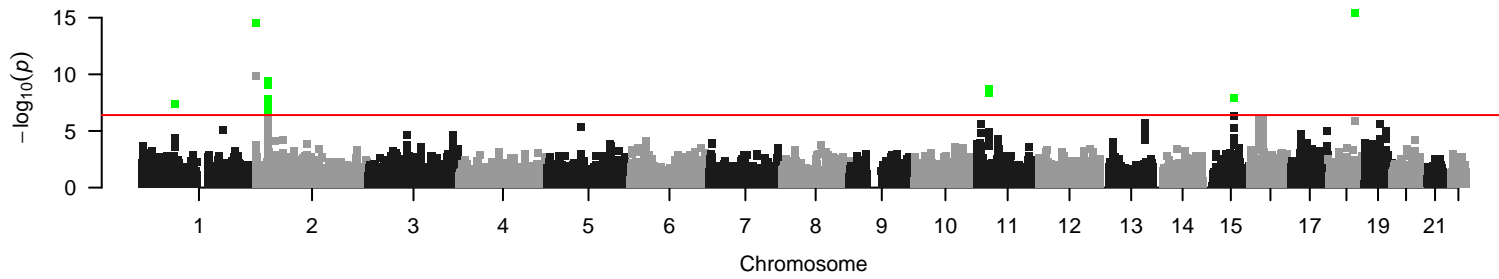

### Parents age at death

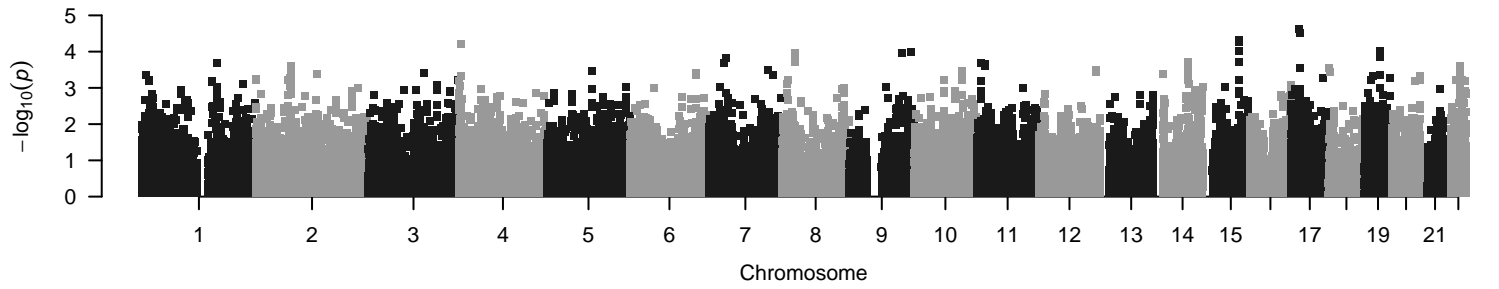

### Peak insulin response

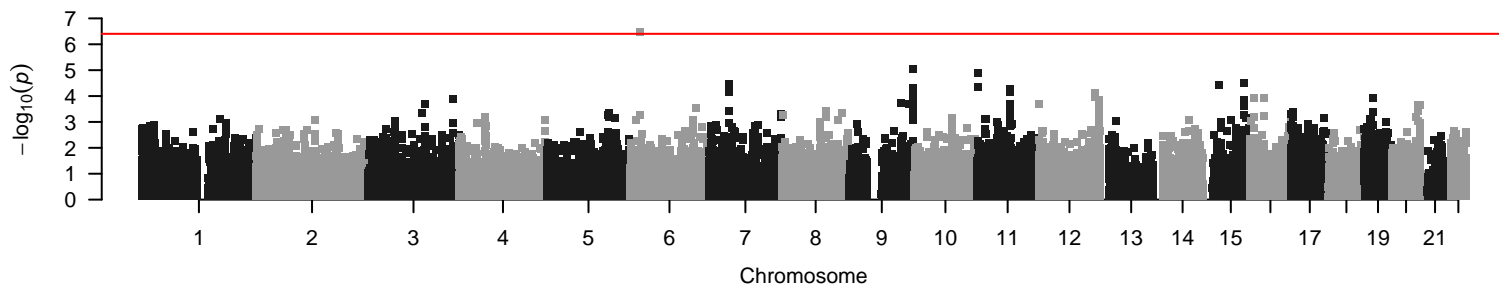

### Peak insulin response adj SI

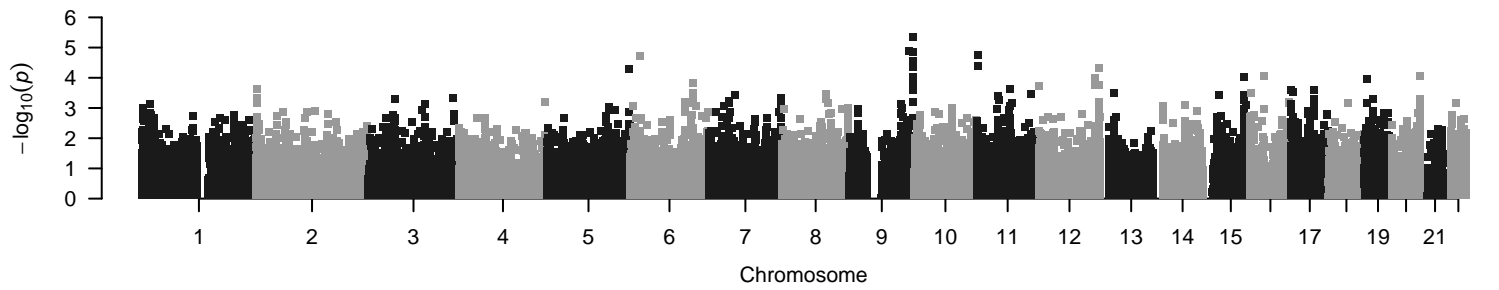

### Peak insulin response adj SI BMI

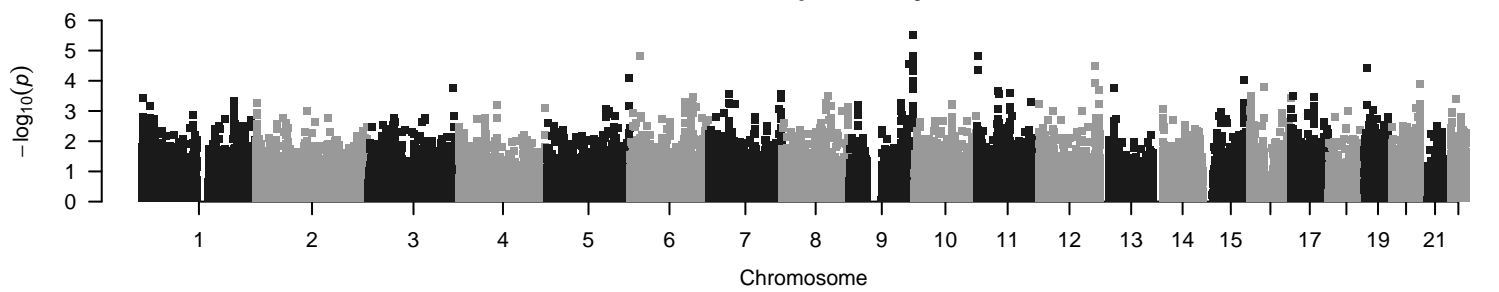

Pubertal Growth – Height at age 10 (F)

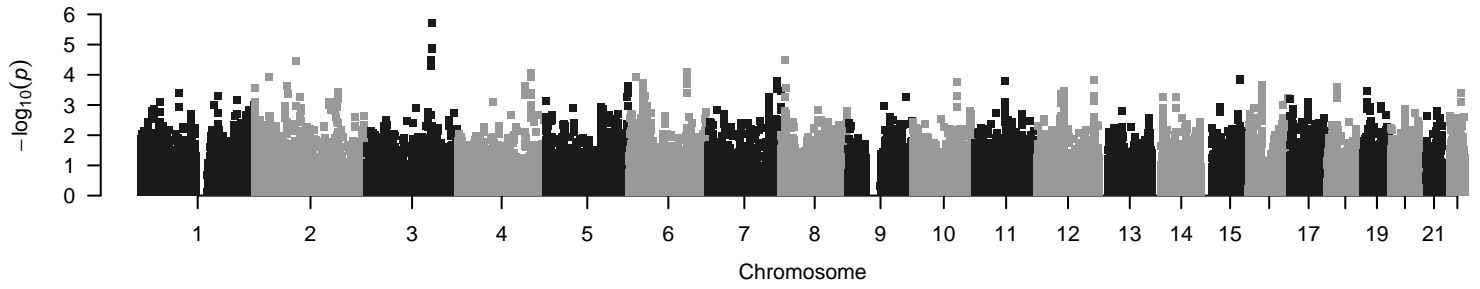

Pubertal Growth – Height at age 10 (F) and 12 (M)

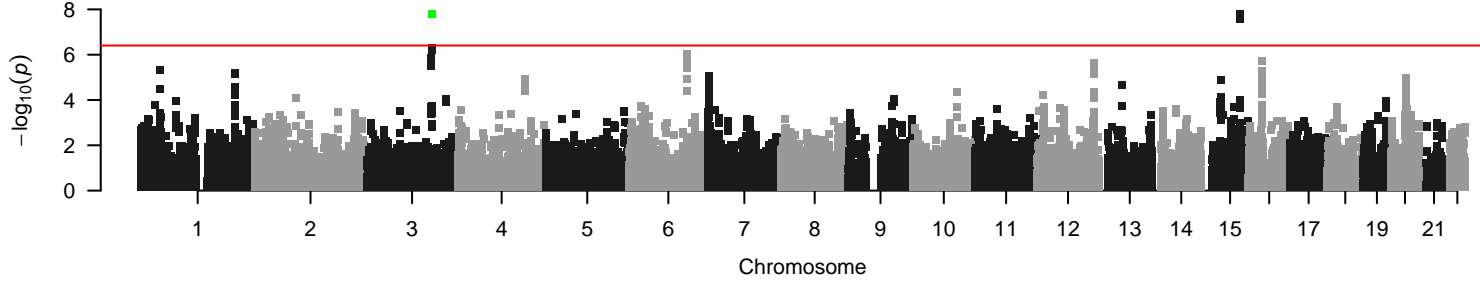

Pubertal Growth – Height at age 12 (M)

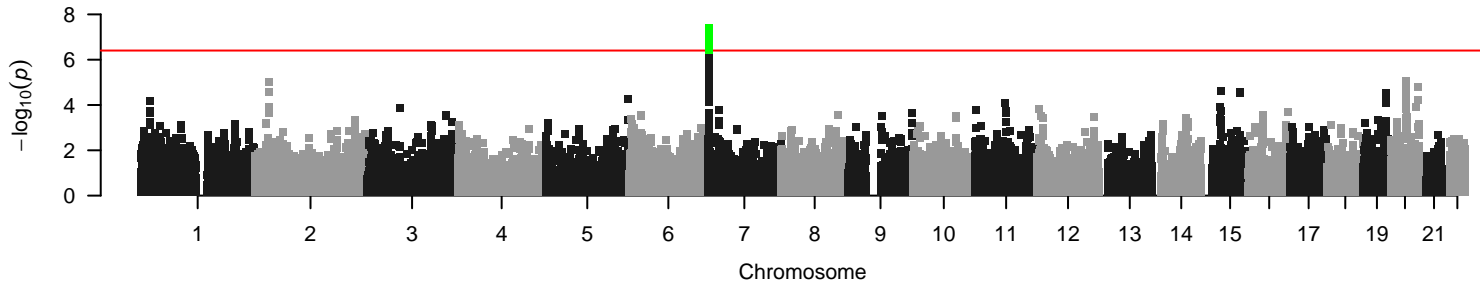

Pubertal Growth – growth across the pubertal growth period (F)

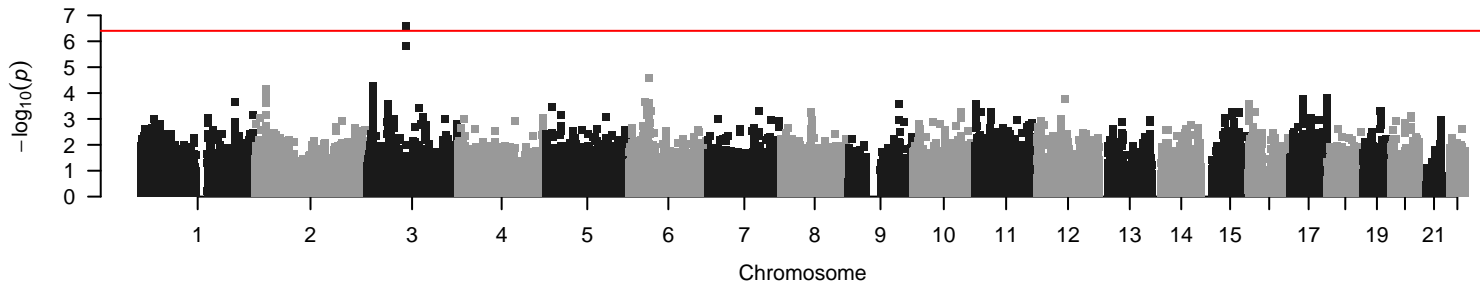

Pubertal Growth – growth across the pubertal growth period

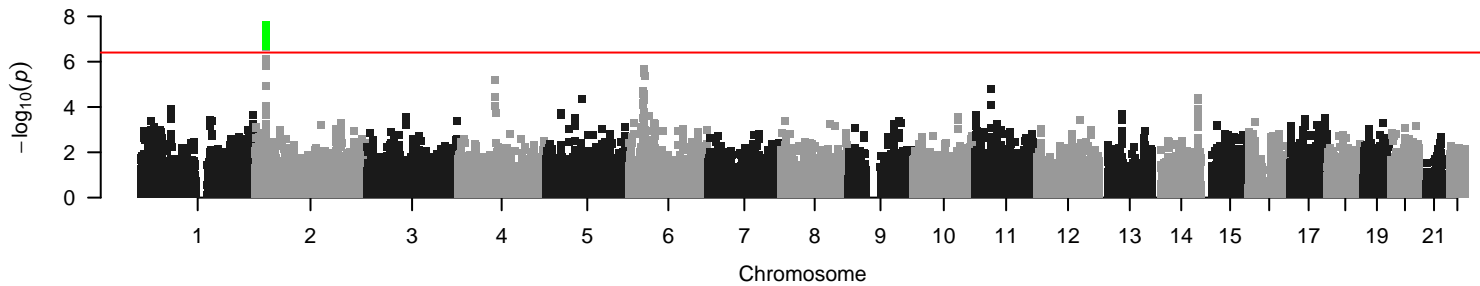

Pubertal Growth – growth across the pubertal growth period (M)

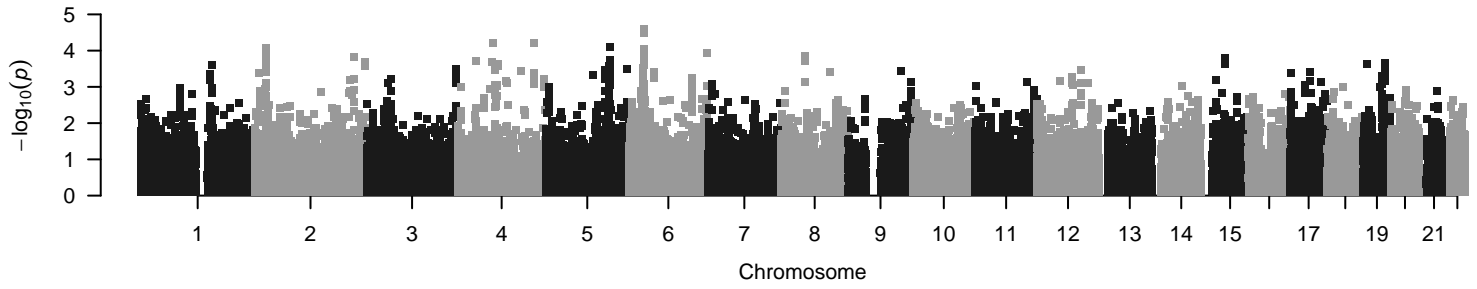

Pubertal Growth – growth in late adolescence (F)

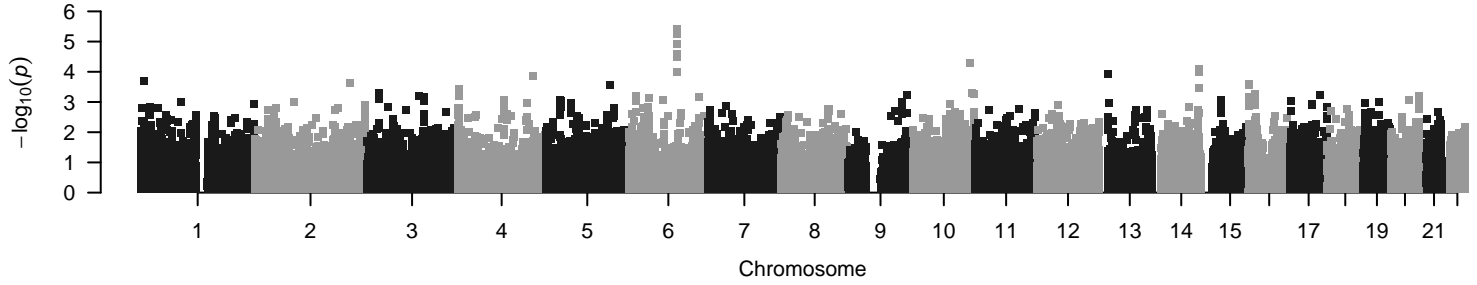

Pubertal Growth – growth in late adolescence

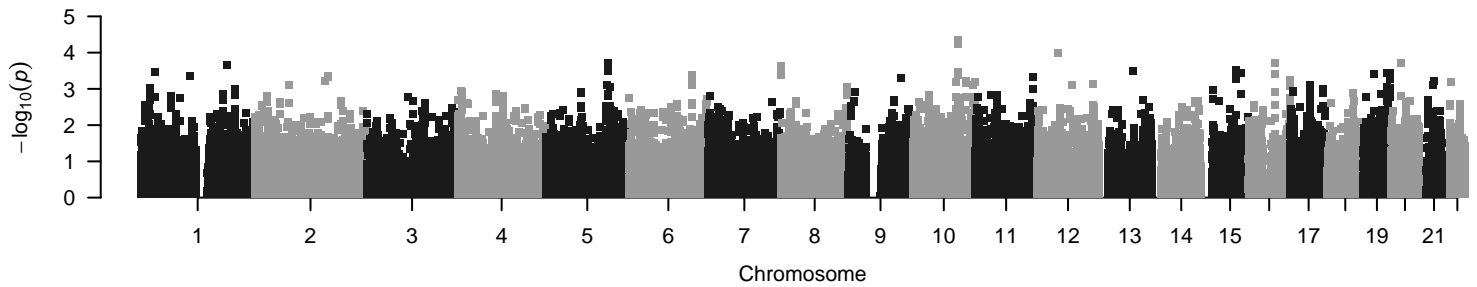

Pubertal Growth – growth in late adolescence (M)

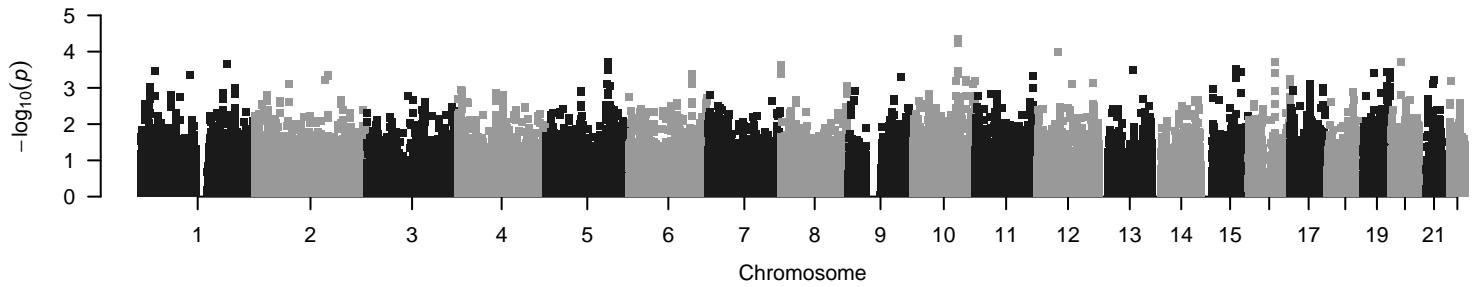

Schizophrenia

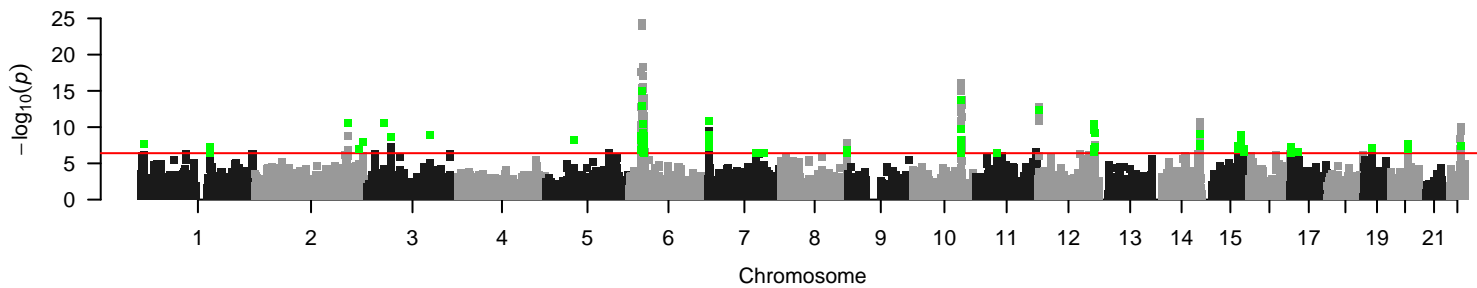

### Sleep Duration

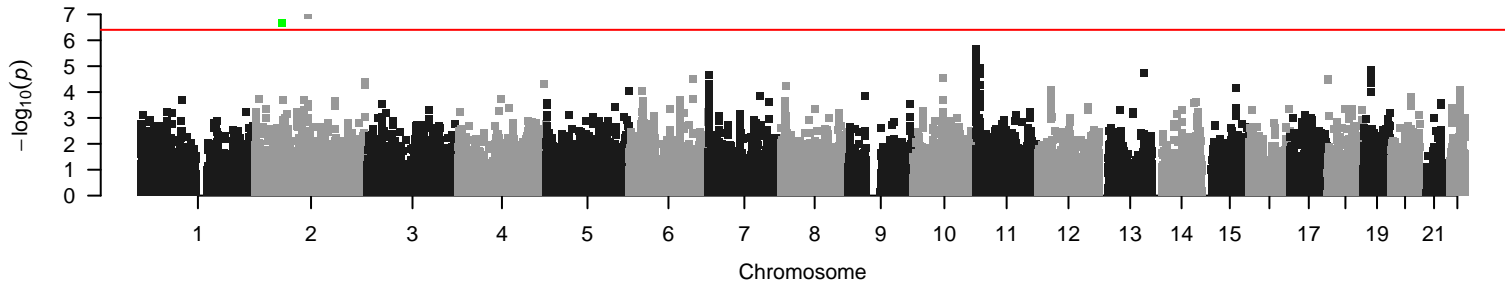

### T2 Diabetes

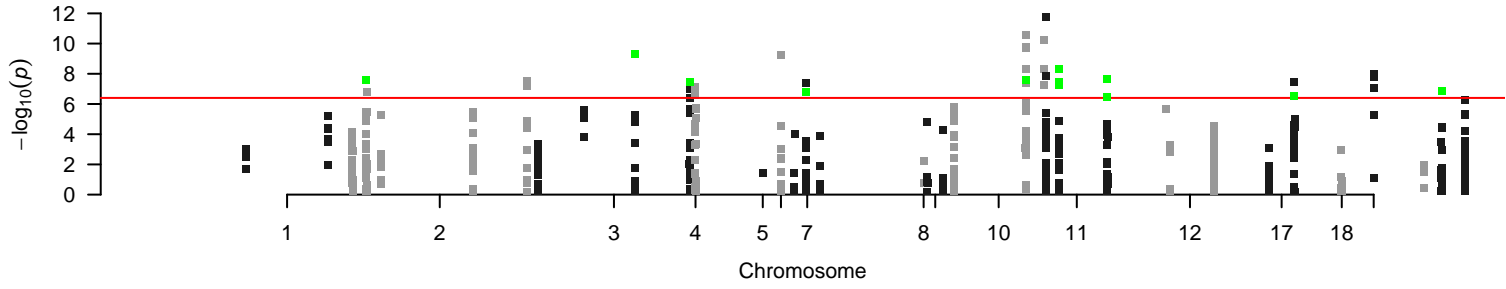

### Tanner stage (F)

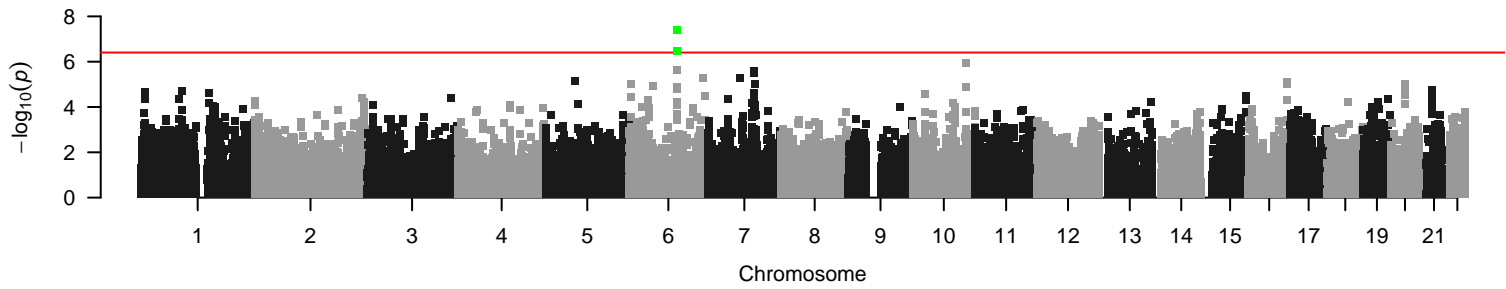

### Tanner stage

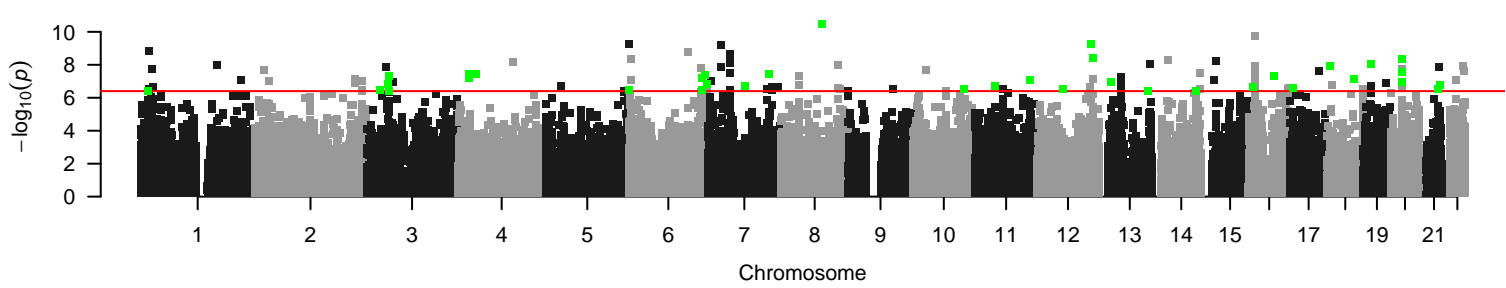

### Tanner stage (M)

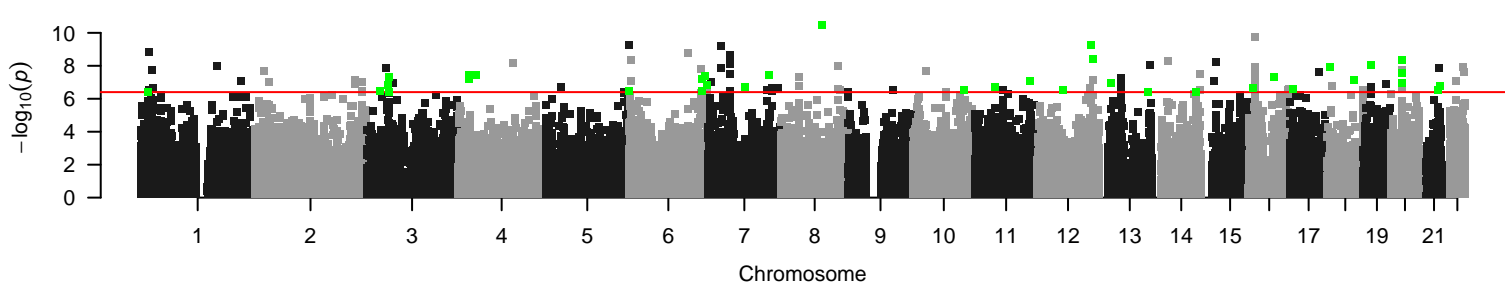



### Total cholesterol

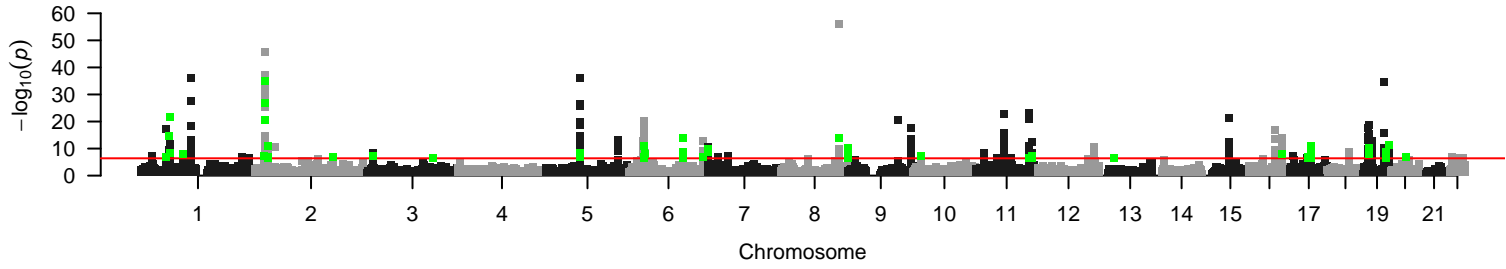

### Triglycerides

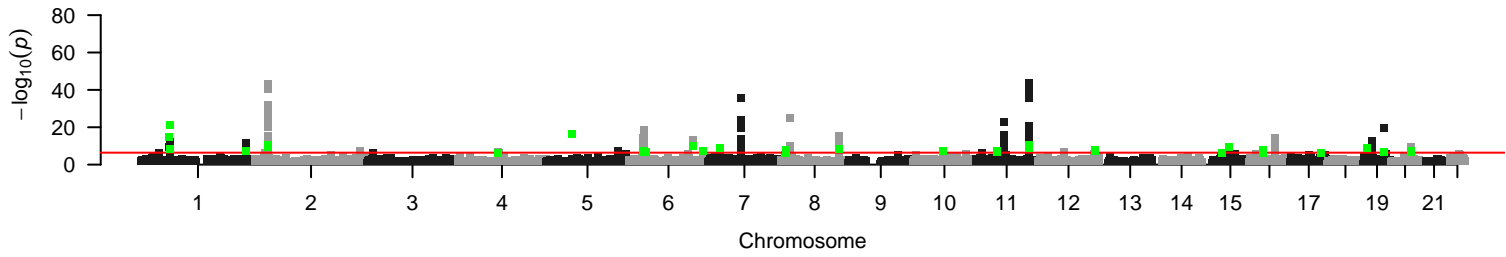

### Urinary albumin-to-creatinine ratio

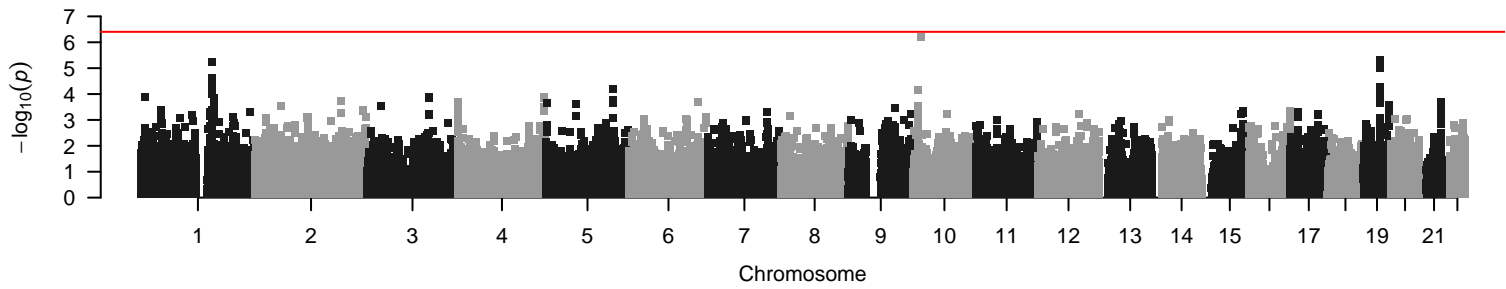

### Ulcerative colitis

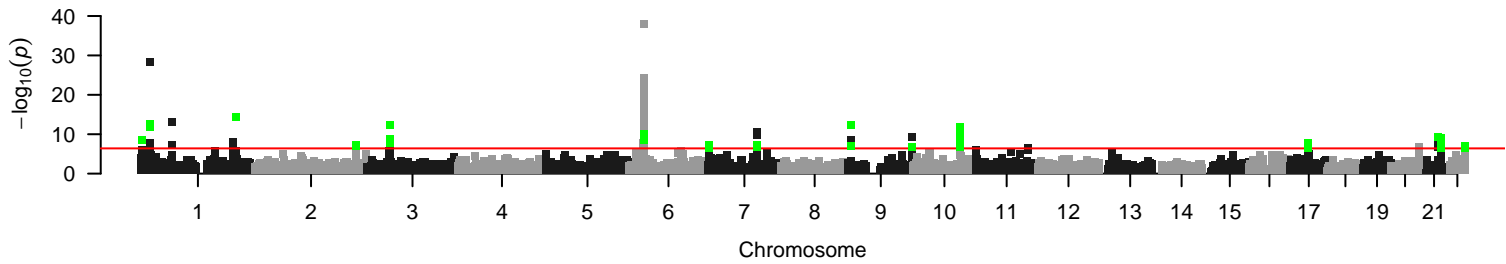

### Waist circumference

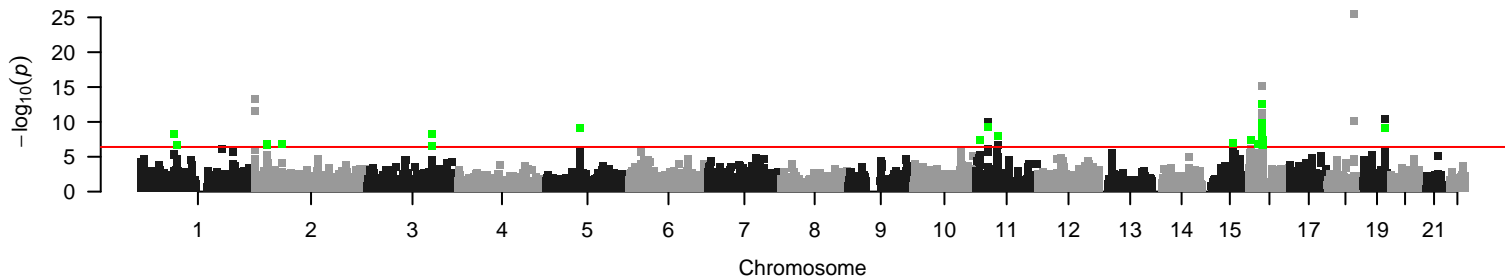

Waist circumference adjusted for BMI

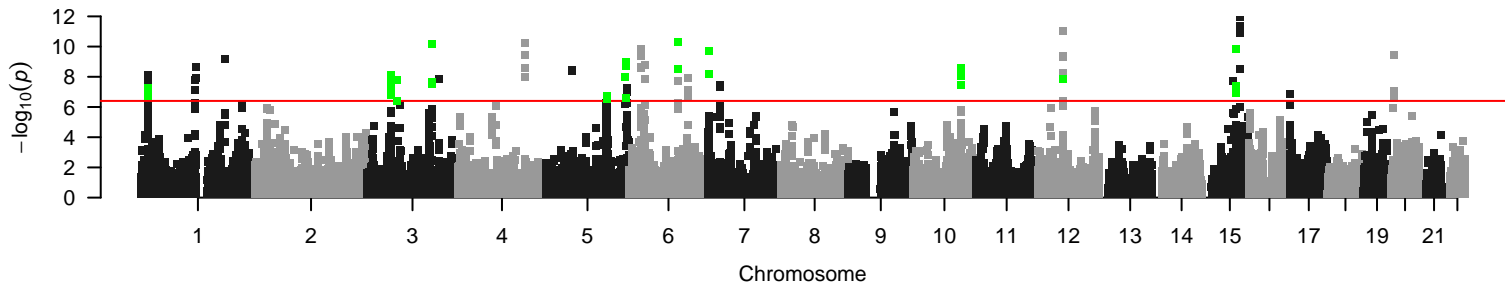

Waist hip ratio

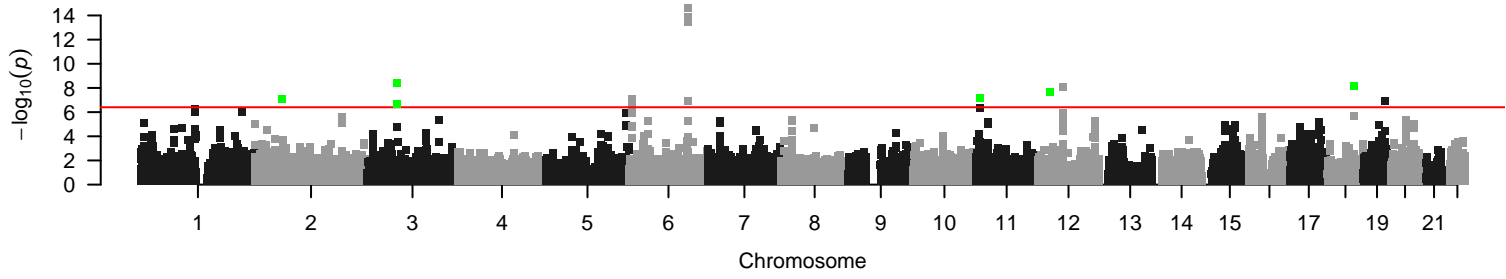

Waist hip ratio adjusted for BMI

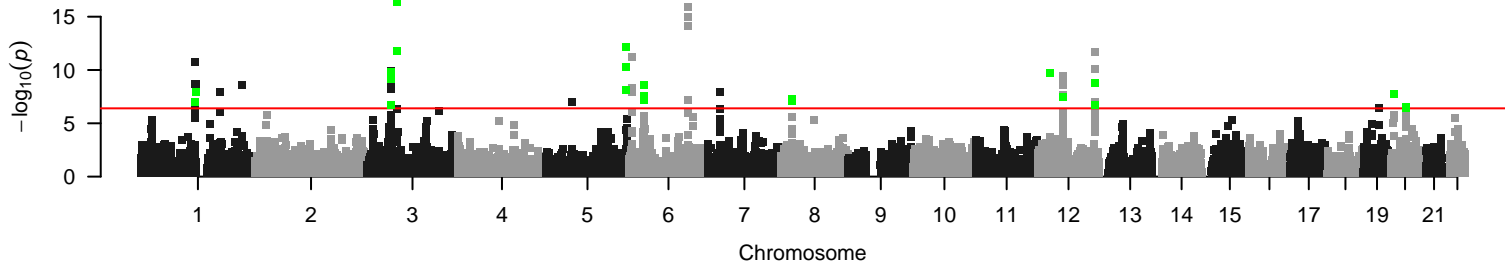

**Figure S14: Replication of significant pleiotropic associations across two independent datasets.** Scatterplots of estimated causal effect from Summary data-based Mendelian Randomization (SMR) analysis between the UKHLS (x-axis) and our previous study (y-axis)(Hannon et al. 2017). Each point represents a significant pleiotropic associations identified in UKHLS also tested in the replication dataset. Green points indicate associations significant in both datasets.

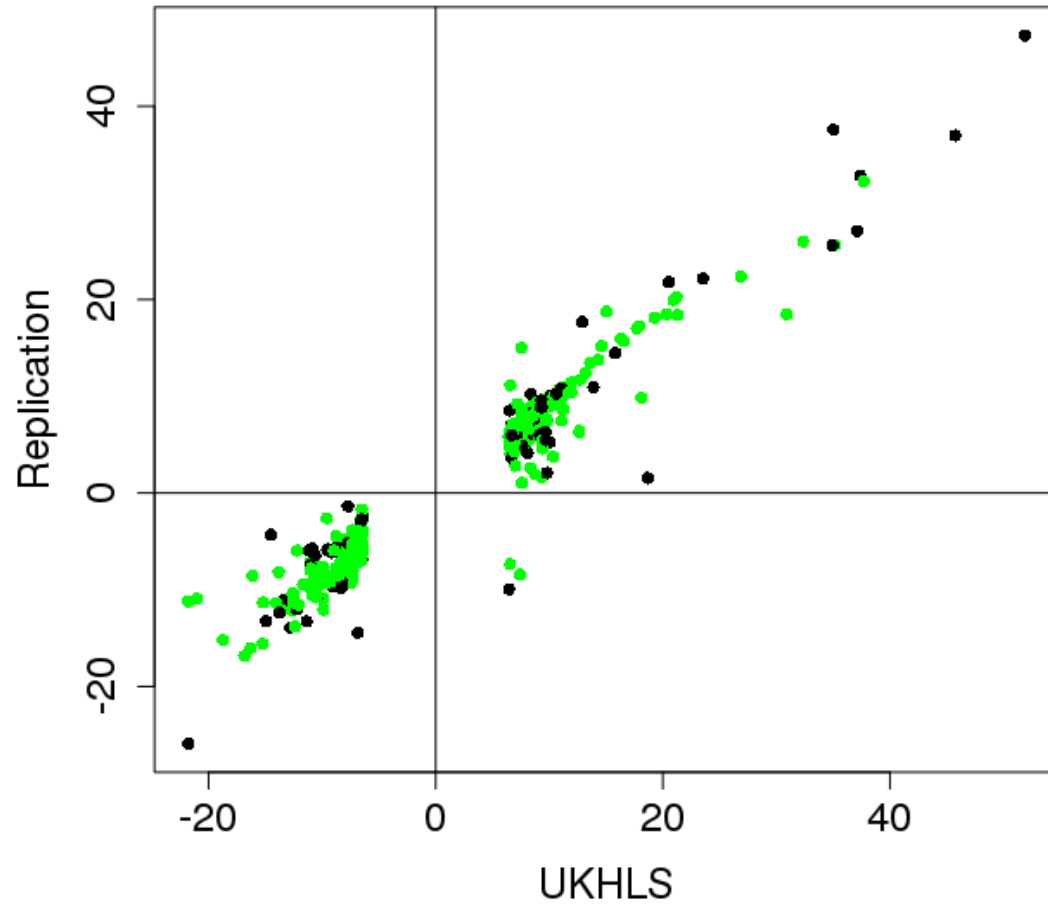

**Figure S15: Flowchart showing the number of gene expression probes, DNAm sites and pairs significant at each stage of the analysis.**

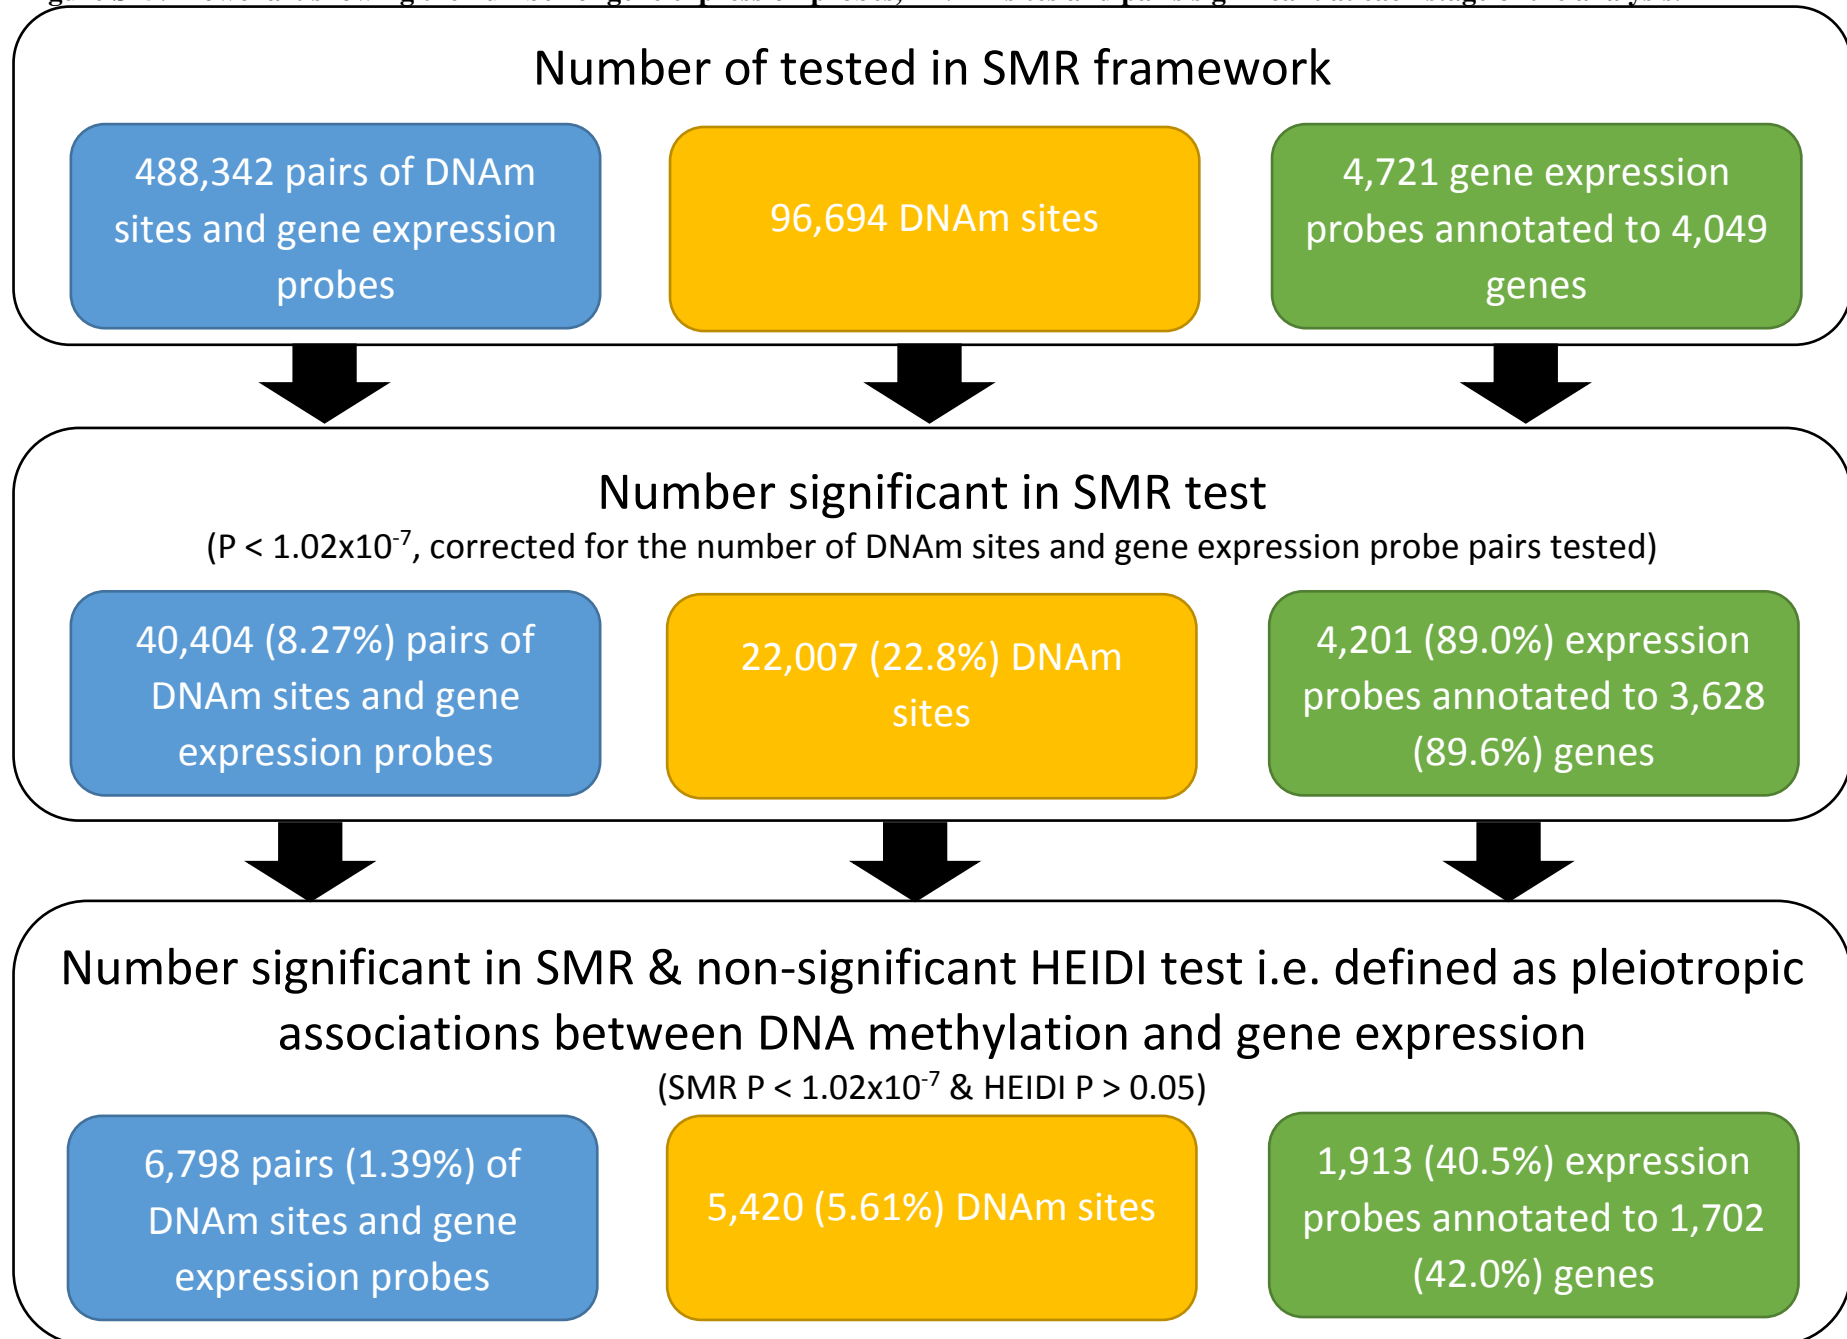

**Figure S16: Genomic distribution of DNA methylation sites pleiotropically associated with gene expression.** Barplot demonstrating the genomic location of DNA methylation sites pleiotropically associated with gene expression (blue bars) compared to the background rate inferred from all DNA methylation sites included in this analysis (gray bars). There was enrichment for DNA methylation sites to be located in the gene body and promoter (TSS1500, TSS200, 5'UTR) and depleted in intergenic regions, see **Table S9** for frequency statistics.

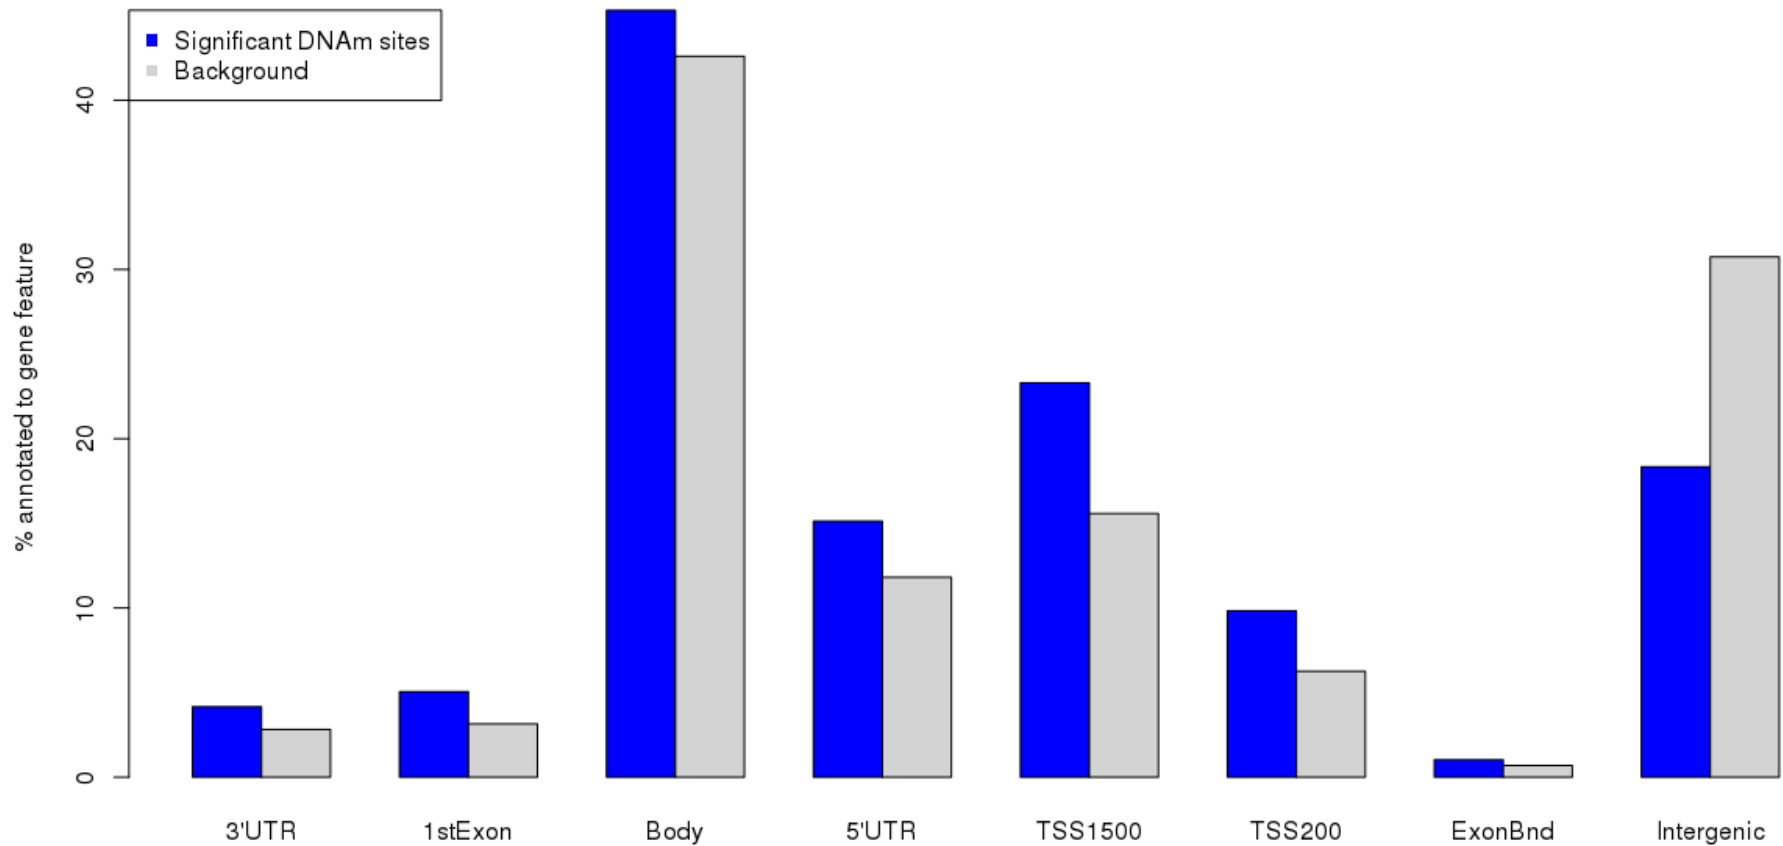

**Figure S17: Distribution of estimated effect of pleiotropic associations between DNA methylation and gene expression, stratified by genic location of DNA methylation site.** Violin plots of effect size estimated from the SMR analysis between DNA methylation and gene expression. Each violin plot represents pleiotropic associations where the DNA methylation site is annotated to that genic feature. All features are associated with both positive and negative relationships with gene expression, however there is a significant shift towards negative associations for 1<sup>st</sup> Exon ( $P = 6.19e-05$ ) 5'UTR ( $P = 0.00108$ ), TSS200 ( $P = 6.38e-07$ ), TSS1500 ( $P = 5.82e-11$ ), gene body ( $P = 0.0230$ ).

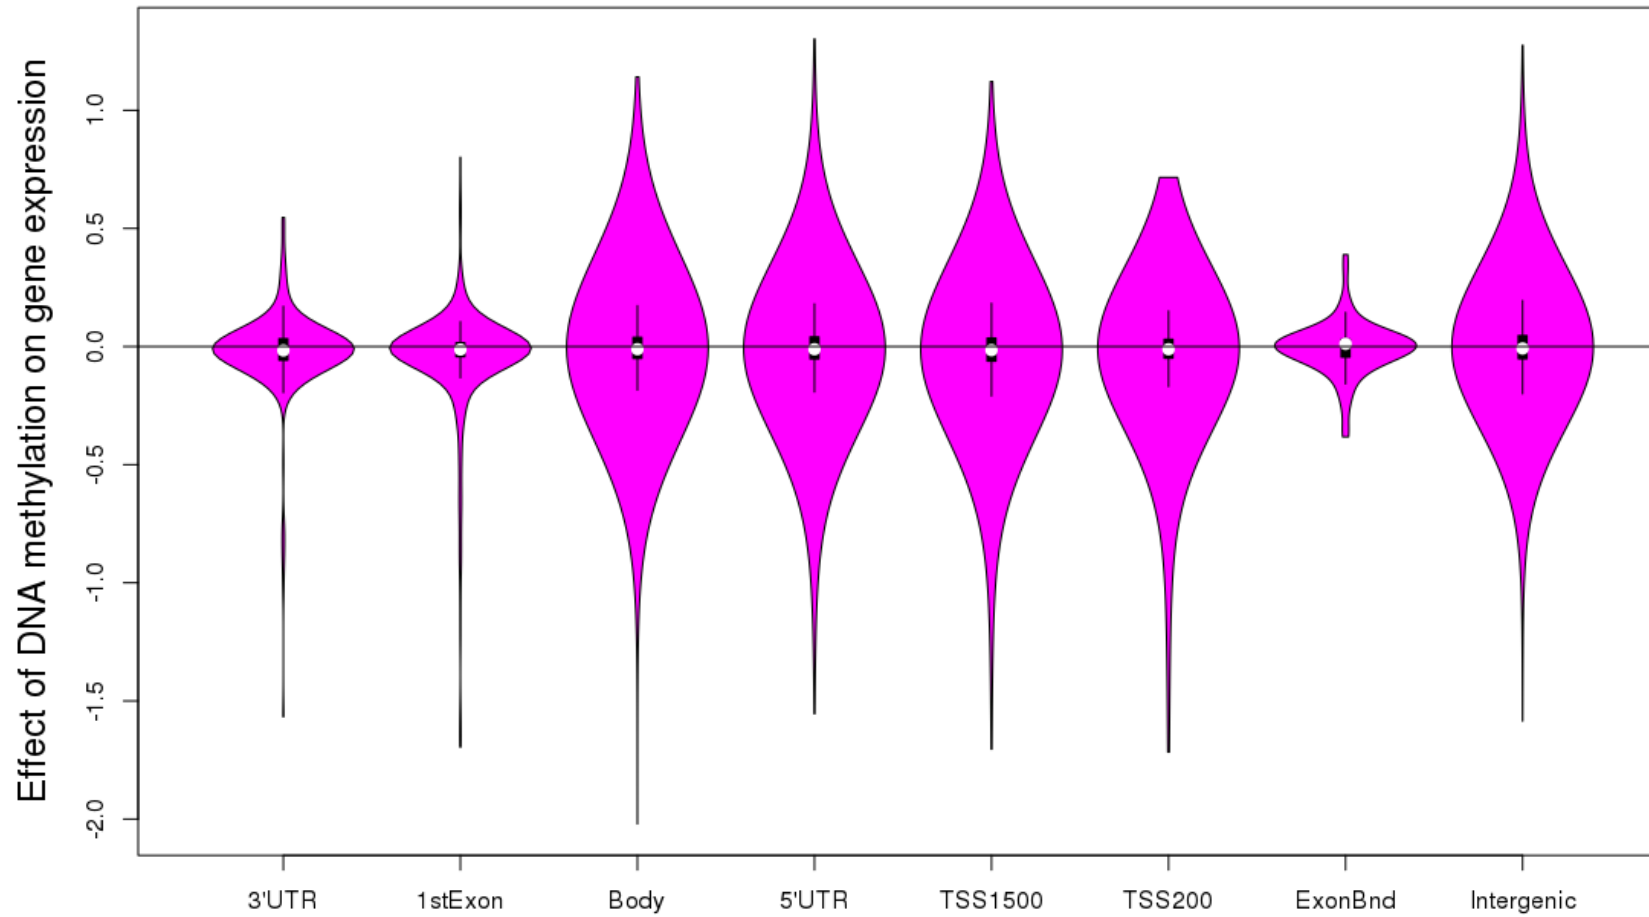

**Table S1: Summary of DNA methylation quantitative trait loci analysis in Understanding Society (n = 1,111).** A) all mQTL; B) mQTL classed as cis (distance between genetic variant and DNA methylation site < 500kb); C) mQTL classed as trans.

A)

| P value threshold | nMQTL    | nSNPs   | nProbes | DNA methylation change per allele |       |
|-------------------|----------|---------|---------|-----------------------------------|-------|
|                   |          |         |         | mean                              | SD    |
| 6.52E-14          | 12689548 | 2907234 | 93268   | 3.46%                             | 3.01% |
| 1.00E-13          | 12886785 | 2926784 | 94209   | 3.44%                             | 3.00% |
| 1.00E-12          | 14040864 | 3036038 | 99833   | 3.31%                             | 2.93% |
| 1.00E-11          | 15399232 | 3152092 | 106408  | 3.18%                             | 2.85% |
| 1.00E-10          | 17051673 | 3281391 | 114595  | 3.03%                             | 2.76% |

B)

| P value threshold | nMQTL    | nSNPs   | nProbes | DNA methylation change per allele |       |
|-------------------|----------|---------|---------|-----------------------------------|-------|
|                   |          |         |         | mean                              | SD    |
| 6.52E-14          | 11679376 | 2837748 | 89325   | 3.48%                             | 3.03% |
| 1.00E-13          | 11854125 | 2857053 | 90197   | 3.46%                             | 3.02% |
| 1.00E-12          | 12866269 | 2964911 | 95439   | 3.33%                             | 2.95% |
| 1.00E-11          | 14055426 | 3079629 | 101414  | 3.20%                             | 2.87% |
| 1.00E-10          | 15479136 | 3204842 | 108405  | 3.05%                             | 2.79% |

C)

| <b>P value<br/>threshold</b> | <b>nMQTL</b> | <b>nSNPs</b> | <b>nProbes</b> | <b>DNA methylation change per allele</b> |           |
|------------------------------|--------------|--------------|----------------|------------------------------------------|-----------|
|                              |              |              |                | <b>mean</b>                              | <b>SD</b> |
| 6.52E-14                     | 1010172      | 398965       | 7791           | 3.26%                                    | 2.78%     |
| 1.00E-13                     | 1032660      | 404570       | 7948           | 3.23%                                    | 2.76%     |
| 1.00E-12                     | 1174595      | 438405       | 8935           | 3.10%                                    | 2.66%     |
| 1.00E-11                     | 1343806      | 478896       | 10224          | 2.98%                                    | 2.56%     |
| 1.00E-10                     | 1572537      | 531470       | 12347          | 2.83%                                    | 2.45%     |



**Table S2: Summary of additional associations from novel content on Illumina EPIC BeadArray compared to Illumina 450K BeadArray.**

| P value threshold | DNAm probes associated with an mQTL |               |                                |                                | Genes associated with an mQTL |                                    |                                                      | Intergenic DNA methylation sites associated with an mQTL |               |
|-------------------|-------------------------------------|---------------|--------------------------------|--------------------------------|-------------------------------|------------------------------------|------------------------------------------------------|----------------------------------------------------------|---------------|
|                   | All                                 | EPIC specific |                                |                                | All                           | Only associated with EPIC specific | Additional association with EPIC of 450K association | All                                                      | EPIC specific |
|                   |                                     | Total         | within 1kb of 450k association | within 5kb of 450k association |                               |                                    |                                                      |                                                          |               |
| 6.52E-14          | 93268                               | 48099         | 8509                           | 15627                          | 16276                         | 5172                               | 6521                                                 | 31087                                                    | 17780         |
| 1.00E-13          | 94209                               | 48593         | 8613                           | 15809                          | 16360                         | 5185                               | 6577                                                 | 31408                                                    | 17955         |
| 1.00E-12          | 99833                               | 51407         | 9180                           | 17020                          | 16802                         | 5211                               | 6905                                                 | 33310                                                    | 19010         |
| 1.00E-11          | 106408                              | 54715         | 9931                           | 18513                          | 17266                         | 5235                               | 7277                                                 | 35399                                                    | 20185         |
| 1.00E-10          | 114595                              | 58884         | 10929                          | 20451                          | 17848                         | 5268                               | 7711                                                 | 38063                                                    | 21677         |

**Table S3: Frequency of DNAm sites in A) genic feature and B) CpG Island feature annotation categories.**

A)

| Genic annotation category | DNAm sites associated with mQTL<br>( $P < 6.52 \times 10^{-14}$ ) |             | All tested DNAm sites |             |
|---------------------------|-------------------------------------------------------------------|-------------|-----------------------|-------------|
|                           | Number                                                            | %           | Number                | %           |
| <b>Body</b>               | 38495                                                             | 41.27353433 | 330180                | 42.11656868 |
| <b>TSS200</b>             | 5805                                                              | 6.223999657 | 75322                 | 9.607802369 |
| <b>TSS1500</b>            | 13567                                                             | 14.54625381 | 116805                | 14.89922407 |
| <b>5'UTR</b>              | 10478                                                             | 11.23429258 | 103362                | 13.18448353 |
| <b>3'UTR</b>              | 2349                                                              | 2.518548698 | 22363                 | 2.852543538 |
| <b>ExonBnd</b>            | 524                                                               | 0.561821847 | 6857                  | 0.874654163 |
| <b>1stExon</b>            | 2963                                                              | 3.176866664 | 43993                 | 5.611588243 |
| <b>Intergenic</b>         | 31087                                                             | 33.33083158 | 217106                | 27.6932575  |

B)

| CpG island annotation category | DNAm sites associated with mQTL<br>( $P < 6.52 \times 10^{-14}$ ) |             | All tested DNAm sites |             |
|--------------------------------|-------------------------------------------------------------------|-------------|-----------------------|-------------|
|                                | Number                                                            | %           | Number                | %           |
| <b>Island</b>                  | 10878                                                             | 11.66316421 | 149471                | 19.06598109 |
| <b>Shore</b>                   | 19850                                                             | 21.28275507 | 141724                | 18.07780174 |
| <b>Shelf</b>                   | 6278                                                              | 6.73114037  | 54623                 | 6.967512663 |
| <b>Sea</b>                     | 56262                                                             | 60.32294034 | 438149                | 55.8887045  |

**Table S9: Frequency of DNAm sites associated with gene expression in gene feature annotation categories.**

| Genic annotation category | DNAm sites associated with gene expression (SMR P < 1.02x10 <sup>-7</sup> & HEIDI P > 0.05) |             | All DNAm sites tested against gene expression |             |
|---------------------------|---------------------------------------------------------------------------------------------|-------------|-----------------------------------------------|-------------|
|                           | Number                                                                                      | %           | Number                                        | %           |
| 3'UTR                     | 226                                                                                         | 4.169741697 | 2728                                          | 2.821271227 |
| 1stExon                   | 274                                                                                         | 5.055350554 | 3044                                          | 3.148075372 |
| Body                      | 2456                                                                                        | 45.31365314 | 41186                                         | 42.59416303 |
| 5'UTR                     | 820                                                                                         | 15.12915129 | 11425                                         | 11.81562455 |
| TSS1500                   | 1263                                                                                        | 23.30258303 | 15063                                         | 15.57800898 |
| TSS200                    | 533                                                                                         | 9.833948339 | 6050                                          | 6.256851511 |
| ExonBnd                   | 56                                                                                          | 1.033210332 | 668                                           | 0.690839142 |
| Intergenic                | 994                                                                                         | 18.33948339 | 29727                                         | 30.74337601 |

## References

- Hannon E, Weedon M, Bray N, O'Donovan M, Mill J. 2017. Pleiotropic Effects of Trait-Associated Genetic Variation on DNA Methylation: Utility for Refining GWAS Loci. *Am J Hum Genet* doi:10.1016/j.ajhg.2017.04.013.
- van Dongen J, Nivard MG, Willemsen G, Hottenga JJ, Helmer Q, Dolan CV, Ehli EA, Davies GE, van Iterson M, Breeze CE et al. 2016. Genetic and environmental influences interact with age and sex in shaping the human methylome. *Nat Commun* **7**: 11115.
